# Supplementary material for: Human Chrysomya bezziana myiasis: A systematic review
Source: PubMed Central journal article supplement (PMC6821133; doi:10.1371/journal.pntd.0007391), 2019-10-16

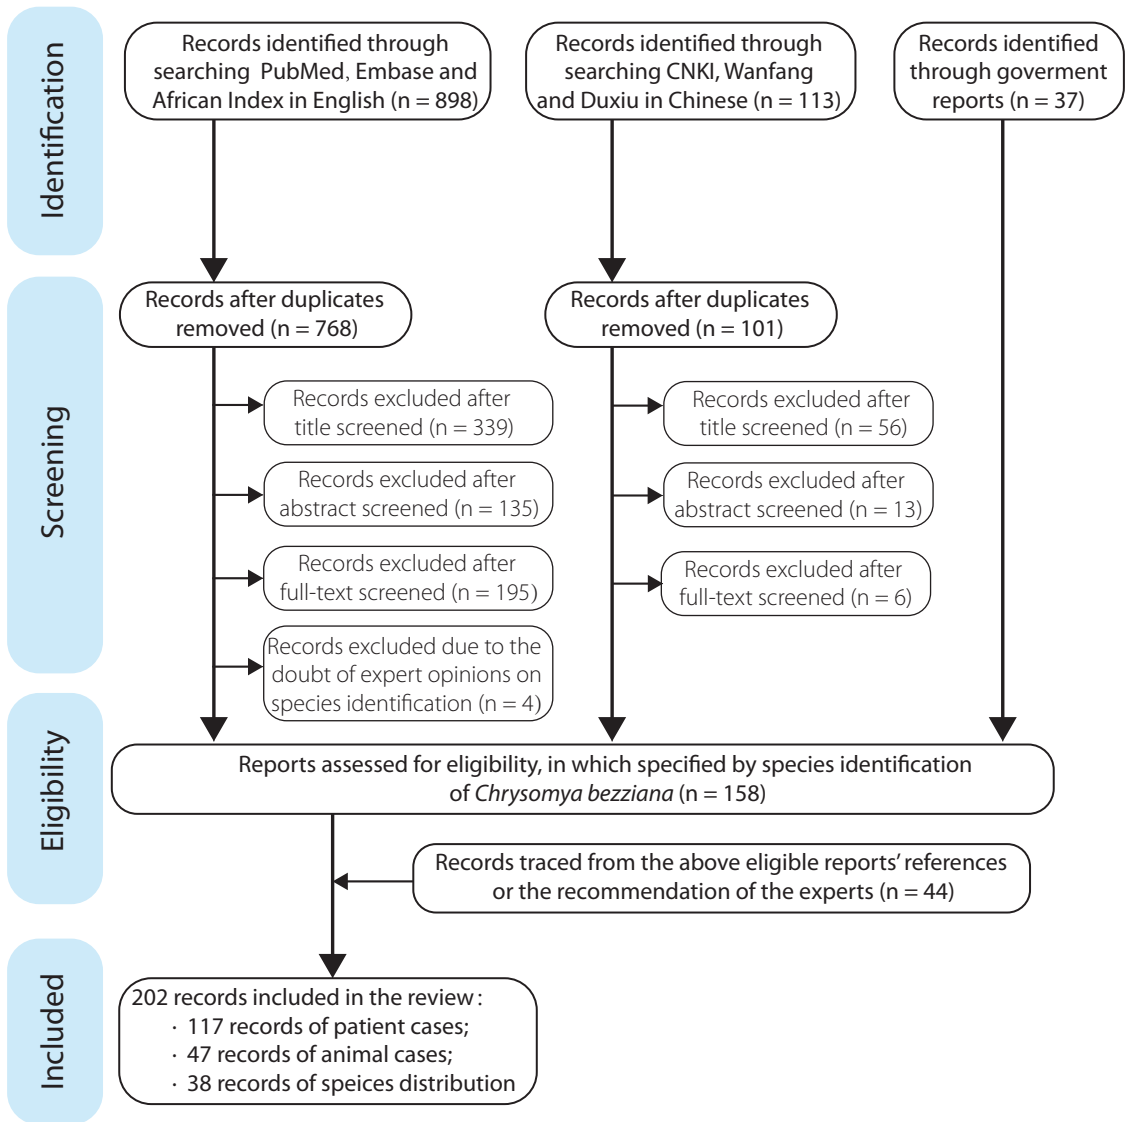

Supplement: pntd.0007391.s001.pdf [file pntd.0007391.s001.pdf]
