# Supplementary material for: Human Chrysomya bezziana myiasis: A systematic review
Source: PubMed Central journal article supplement (PMC6821133; doi:10.1371/journal.pntd.0007391), 2019-10-16

Mouth  
Limb  
Perineal/inguinal regions  
Ear  
Eye  
Nose  
Tracheostomy/Pharyngostomy  
Face  
Scalp  
Torso

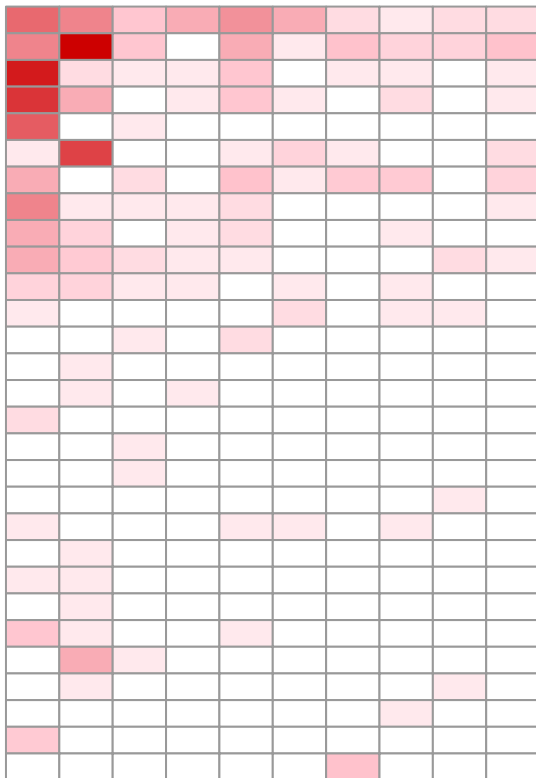

Infection  
Open wounds\*  
Bedridden/debility/wheelchair bound  
Multiple underlying illnesses  
Tube feeding  
Diabetes  
Cancer\*\*  
Dementia  
Stroke  
Mental illness excluding dementia  
Hypertension  
Anemia  
Bladder/bowel incontinence  
Drug addiction  
Blindness/deafness  
Malnutrition  
Postpartum lochia  
Miscarriage  
Chronic seborrhoeic eczema  
Asthma  
Thyroid disorder  
Cardiovascular disease  
Renal disease  
Neurological disorder  
Dermatitis  
Ectoparasite infestation/bites  
Gout  
Mouth breathing/incompetent lips  
Tracheostomy/Pharyngostomy

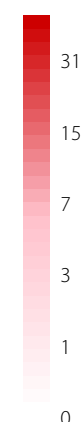

Supplement: pntd.0007391.s002.pdf [file pntd.0007391.s002.pdf]
