# Supplementary material for: Human Chrysomya bezziana myiasis: A systematic review
Source: PubMed Central journal article supplement (PMC6821133; doi:10.1371/journal.pntd.0007391), 2019-10-16
Supplement: pntd.0007391.s005.pdf [file pntd.0007391.s005.pdf]

**S1 Table. Characteristics of human cases due to *Chrysomya bezziana* myiasis recorded worldwide.**

| ID               | Age | Sex | Year | Country | Location               | Socioeconomic status      | Site of infestation                  | Methods for removal of larvae                                       | Underlying diseases                                                                                           | Clinical signs and symptoms                            | Outcome                        |
|------------------|-----|-----|------|---------|------------------------|---------------------------|--------------------------------------|---------------------------------------------------------------------|---------------------------------------------------------------------------------------------------------------|--------------------------------------------------------|--------------------------------|
| 1 <sup>70</sup>  | 49  | F   | 2004 | China   | Hong Kong              | The elderly home          | Torso: left breast                   | Surgical removal                                                    | Left breast cancer                                                                                            | Bleeding, discharge, ulcer, noticed larvae             | NR                             |
| 2 <sup>71</sup>  | 81  | F   | 2005 | China   | Hong Kong              | The elderly home          | Mouth                                | NR                                                                  | Bedridden, ulcer                                                                                              | Bleeding, noticed larvae                               | Death (septicemia)**           |
| 3 <sup>72</sup>  | 79  | F   | 2005 | China   | Hong Kong              | The elderly home          | Mouth                                | NR                                                                  | Bedridden                                                                                                     | Bleeding, chills, noticed larvae                       | Death (NR)**                   |
| 4 <sup>73</sup>  | 78  | F   | 2005 | China   | Hong Kong              | An extended care hospital | Mouth                                | Surgical removal                                                    | NR                                                                                                            | Swollen, bleeding                                      | Stable                         |
| 5 <sup>74</sup>  | 50  | F   | 2005 | China   | Hong Kong              | NR                        | Limb: left lower limb                | NR                                                                  | Ulcer                                                                                                         | NR                                                     | Stable                         |
| 6 <sup>75</sup>  | 66  | M   | 2006 | China   | Hong Kong              | NR                        | Scalp                                | NR                                                                  | Scalp wound                                                                                                   | Noticed larvae                                         | Stable                         |
| 7 <sup>76</sup>  | 49  | M   | 2006 | China   | Hong Kong              | NR                        | Perineal & inguinal regions: groin   | NR                                                                  | NR                                                                                                            | Pain, noticed larvae                                   | Stable                         |
| 8 <sup>77</sup>  | 79  | M   | 2006 | China   | Hong Kong              | The elderly home          | Mouth                                | Surgical removal                                                    | Bedridden                                                                                                     | Bleeding, ulcer, noticed larvae                        | Stable                         |
| 9 <sup>78</sup>  | 93  | F   | 2007 | China   | Hong Kong              | The elderly home          | Mouth: right lower gum               | Surgical removal                                                    | Bedridden, stroke                                                                                             | Bleeding, fever                                        | Stable                         |
| 10 <sup>79</sup> | 49  | M   | 2010 | China   | Hong Kong              | NR                        | Torso: right shoulder                | NR                                                                  | Nasopharyngeal carcinoma, slipped and fell into a valley, a shoulder wound                                    | Noticed larvae                                         | Stable                         |
| 11 <sup>80</sup> | 31  | F   | 2010 | China   | Hong Kong (Indonesian) | NR                        | Torso: back                          | NR                                                                  | Infection: ruptured back mass, wound                                                                          | Bleeding, discharge, noticed larvae                    | Stable                         |
| 12 <sup>80</sup> | 93  | F   | 2010 | China   | Hong Kong              | The elderly home          | Mouth                                | NR                                                                  | Multiple underlying illnesses, bedridden, dementia, tube feeding                                              | Fever, ulcer                                           | Death (underlying illnesses)** |
| 13 <sup>29</sup> | 78  | F   | 2010 | China   | Hong Kong              | The elderly home          | Mouth                                | NR                                                                  | Bedridden                                                                                                     | Bleeding, noticed larvae                               | Discharged                     |
| 14 <sup>29</sup> | 81  | M   | 2010 | China   | Hong Kong              | The elderly home          | Torso: sacral sore                   | NR                                                                  | Bedridden, dementia, multiple bed sores, infections                                                           | Noticed larvae                                         | Death (NR)**                   |
| 15 <sup>29</sup> | 80  | F   | 2010 | China   | Hong Kong              | The elderly home          | Tracheostomy                         | NR                                                                  | Bedridden, tracheostomy wound                                                                                 | Bleeding, noticed larvae                               | Stable                         |
| 16 <sup>81</sup> | 89  | F   | 2010 | China   | Hong Kong              | NR                        | Limb: left foot                      | NR                                                                  | Slipped and an injury over her left foot, infection: later developed gangrene, wound                          | Necrosis                                               | Stable                         |
| 17 <sup>81</sup> | 88  | F   | 2010 | China   | Hong Kong              | The elderly home          | Mouth                                | NR                                                                  | Bedridden, tube feeding                                                                                       | Bleeding, noticed larvae                               | Stable                         |
| 18 <sup>25</sup> | 89  | F   | 2011 | China   | Hong Kong              | Home                      | Limb: right foot                     | Surgical removal, below knee amputation due to extensive ulceration | Multiple underlying illnesses, hypertension, stroke, diabetes mellitus, diabetic ulcer                        | Noticed larvae, severe tissues and/or bone destruction | Stable                         |
| 19 <sup>82</sup> | 83  | F   | 2011 | China   | Hong Kong              | The elderly home          | Limb: right foot                     | Manual removal, surgical removal                                    | Peripheral vascular disease with chronic ulcers on both legs                                                  | Noticed larvae                                         | Stable                         |
| 20 <sup>83</sup> | 82  | M   | 2011 | China   | Hong Kong              | home                      | Limb: right toe                      | Manual removal                                                      | Multiple underlying illnesses, dementia, hypertension, stroke, right toe ulcer                                | Noticed larvae, fever                                  | Recovery/discharged            |
| 21 <sup>84</sup> | 80  | F   | 2011 | China   | Hong Kong              | NR                        | Mouth: gum                           | Manual removal                                                      | Multiple underlying illnesses, bedridden                                                                      | Bleeding, noticed larvae                               | Recovery/discharged            |
| 22 <sup>84</sup> | 82  | M   | 2011 | China   | Hong Kong              | The elderly home          | Mouth                                | Manual removal                                                      | Multiple underlying illnesses, bedridden, stroke, dementia, hypertension, chest infection                     | Fever, swollen, noticed larvae                         | Death (Pneumonia)**            |
| 23 <sup>85</sup> | 94  | F   | 2011 | China   | Hong Kong              | The elderly home          | Mouth                                | Manual removal                                                      | Dementia,bedridden                                                                                            | Fever, noticed larvae                                  | Stable                         |
| 24 <sup>86</sup> | 94  | F   | 2011 | China   | Hong Kong              | The elderly home          | Ear                                  | Manual removal                                                      | Multiple underlying illnesses, ear infection: chronic otitis media, hypertension, stroke, dementia, bedridden | Discharge, noticed larvae                              | Stable                         |
| 25 <sup>87</sup> | 79  | F   | 2011 | China   | Hong Kong              | The elderly home          | Mouth                                | Manual removal                                                      | Multiple underlying illnesses, tube feeding, hypertension, stroke, pneumonia                                  | Fever, noticed larvae                                  | Death (Pneumonia)**            |
| 26 <sup>30</sup> | 47  | M   | 2012 | China   | Hong Kong              | Home                      | Tracheostomy                         | Manual removal                                                      | Nasopharyngeal carcinoma                                                                                      | Fever, discharge, noticed larvae                       | Stable                         |
| 27 <sup>88</sup> | 51  | M   | 2012 | China   | Hong Kong              | The elderly home          | Limb: right big toe                  | Manual removal, surgical removal, antibiotics                       | Ulcer                                                                                                         | Swollen, bleeding, fever, noticed larvae               | Recovery/discharged            |
| 28 <sup>88</sup> | 84  | M   | 2012 | China   | Hong Kong              | The elderly home          | Mouth                                | Manual removal                                                      | Multiple underlying illnesses                                                                                 | Fever, noticed larvae                                  | Stable                         |
| 29 <sup>88</sup> | 88  | M   | 2012 | China   | Hong Kong              | The elderly home          | Mouth: upper lip, hard palate        | NR                                                                  | Multiple underlying illnesses                                                                                 | Noticed larvae, necrosis, swollen                      | Stable                         |
| 30 <sup>89</sup> | 83  | M   | 2013 | China   | Hong Kong              | The elderly home          | Limb: left forearm                   | NR                                                                  | Multiple underlying illnesses, bedridden, ulcer                                                               | Noticed larvae                                         | NR                             |
| 31 <sup>89</sup> | 73  | F   | 2013 | China   | Hong Kong              | The elderly home          | Mouth: upper palate                  | Manual removal                                                      | Multiple underlying illnesses, bedridden, tube feeding                                                        | Noticed larvae                                         | Recovery/discharged            |
| 32 <sup>90</sup> | 69  | M   | 2013 | China   | Hong Kong              | The elderly home          | Mouth: the hard palate               | Manual removal                                                      | Multiple underlying illnesses, wheelchair bound, pneumonia                                                    | Fever, swollen, bleeding, necrosis                     | Death (NR)**                   |
| 33 <sup>91</sup> | 90  | F   | 2013 | China   | Hong Kong              | The elderly home          | Mouth: gum, the upper palate         | Manual removal                                                      | Multiple underlying illnesses, bedridden, tube feeding, pneumonia                                             | Swollen, bleeding, ulcer, noticed larvae               | Death (Pneumonia)**            |
| 34 <sup>92</sup> | 80  | F   | 2013 | China   | Hong Kong              | The elderly home          | Mouth                                | Surgical removal                                                    | Multiple underlying illnesses, bedridden, tube feeding                                                        | Noticed larvae                                         | Stable, discharged             |
| 35 <sup>93</sup> | 91  | M   | 2015 | China   | Hong Kong              | The elderly home          | Mouth                                | NR                                                                  | Multiple underlying illnesses, bedridden, tube feeding                                                        | Feeding problem, noticed larvae, ulcer                 | Death (underlying illnesses)** |
| 36 <sup>94</sup> | 67  | M   | 2015 | China   | Hong Kong              | RCHE                      | Mouth: right upper lip, palate       | Manual removal                                                      | Multiple underlying illnesses, bedridden                                                                      | Necrosis, bleeding, noticed larvae                     | Stable                         |
| 37 <sup>95</sup> | 74  | M   | 2015 | China   | Hong Kong              | RCHE                      | Mouth                                | Antibiotics                                                         | Multiple underlying illnesses, chest infection, bedridden                                                     | Bleeding, noticed larvae                               | Death (Pneumonia)**            |
| 38 <sup>96</sup> | 95  | M   | 2015 | China   | Hong Kong              | RCHE                      | Mouth                                | NR                                                                  | Multiple underlying illnesses, tube feeding, bedridden                                                        | Ulcer, noticed larvae                                  | Death (NR)**                   |
| 39 <sup>97</sup> | 67  | M   | 2015 | China   | Hong Kong              | RCHE                      | Mouth: right upper lip, upper palate | Manual removal                                                      | Multiple underlying illnesses, bedridden                                                                      | Necrosis, bleeding, noticed larvae, ulcer              | Stable                         |
| 40 <sup>98</sup> | 71  | M   | 2015 | China   | Hong Kong              | RCHE                      | Mouth                                | NR                                                                  | Multiple underlying illnesses, bedridden, chest infection                                                     | Bleeding, noticed larvae                               | Death (Pneumonia)**            |
| 41 <sup>99</sup> | 89  | F   | 2016 | China   | Hong Kong              | RCHE                      | Mouth                                | Manual removal                                                      | Multiple underlying illnesses, bedridden, tube feeding                                                        | Swollen, noticed larvae                                | Recovery/discharged            |

|                      |    |    |           |       |                   |                             |                                                 |                                                                      |                                                                                                                                                                                                                                                                                                              |                                                                                                                                 |                                                                   |
|----------------------|----|----|-----------|-------|-------------------|-----------------------------|-------------------------------------------------|----------------------------------------------------------------------|--------------------------------------------------------------------------------------------------------------------------------------------------------------------------------------------------------------------------------------------------------------------------------------------------------------|---------------------------------------------------------------------------------------------------------------------------------|-------------------------------------------------------------------|
| 42 <sup>99</sup>     | 88 | M  | 2016      | China | Hong Kong         | RCHE                        | Mouth                                           | NR                                                                   | Multiple underlying illnesses, bedridden, tube feeding                                                                                                                                                                                                                                                       | Noticed larvae                                                                                                                  | Stable                                                            |
| 43 <sup>100</sup>    | 80 | M  | 2016      | China | Hong Kong         | NR                          | Limb: left ankle                                | Manual removal                                                       | Multiple underlying illness, chronic left ankle ulcer                                                                                                                                                                                                                                                        | Noticed larvae                                                                                                                  | Stable                                                            |
| 44 <sup>100</sup>    | 95 | F  | 2016      | China | Hong Kong         | RCHE                        | Limb: right big toe                             | NR                                                                   | Multiple underlying illness, trauma                                                                                                                                                                                                                                                                          | Noticed larvae                                                                                                                  | Recovery/discharged                                               |
| 45 <sup>101</sup>    | 46 | F  | 2016      | China | Hong Kong         | Home                        | Torso: right breast                             | Manual removal                                                       | Multiple underlying illnesses, right breast wound                                                                                                                                                                                                                                                            | Noticed larvae                                                                                                                  | Recovery/discharged                                               |
| 46 <sup>102</sup>    | 88 | M  | 2017      | China | Hong Kong         | RCHE                        | Mouth                                           | Manual removal                                                       | Multiple underlying illnesses, debility                                                                                                                                                                                                                                                                      | Noticed larvae                                                                                                                  | Stable                                                            |
| 47 <sup>103</sup>    | 65 | M  | 2018      | China | Hong Kong         | Low, RCHE                   | Mouth: palate                                   | Manual removal, antibiotics                                          | Infection: left dental abscess, ulcer                                                                                                                                                                                                                                                                        | Fever,swollen, extensive palatal ulcers, noticed larvae                                                                         | Stable, discharged                                                |
| 48 <sup>103</sup>    | 83 | F  | 2018      | China | Hong Kong         | Low, RCHE                   | Mouth                                           | Manual removal, antibiotics                                          | Multiple underlying illnesses, large ulcer                                                                                                                                                                                                                                                                   | Gum bleeding, a large ulcer, noticed larvae                                                                                     | Death (NR)**                                                      |
| 49 <sup>53</sup>     | 96 | M  | 2005      | China | Hong Kong         | Nursing home                | Mouth                                           | Manual removal, antibiotics, suffocating agent: turpentine           | Multiple underlying illnesses, carcinoma of the lung and prostate, dementia, bedridden, infection: severe pneumonia                                                                                                                                                                                          | Fever, noticed larvae, ulcer, discharge, necrosis                                                                               | Death (Pneumonia)**                                               |
| 50 <sup>53</sup>     | 85 | M  | 2005      | China | Hong Kong         | Home                        | Face: tumour base                               | Manual removal, antibiotics, suffocating agent: turpentine           | Multiple underlying illnesses, stroke, gout, hypertension, left facial basal cell carcinoma, ulcer, semi-bedridden                                                                                                                                                                                           | Ulcer, noticed larvae                                                                                                           | Recovery/discharged                                               |
| 51 <sup>53</sup>     | 90 | F  | 2011      | China | Hong Kong         | Nursing home                | Eye                                             | Manual removal, antibiotics, suffocating agent: turpentine           | Multiple underlying illnesses, Chronic obstructive pulmonary disease, stroke, dementia, bedridden, right eyelid squamous cell carcinoma, Infection: old tuberculosis and aspergillosis                                                                                                                       | Swollen, discharge, noticed larvae                                                                                              | Death (Myocardial infarction)**                                   |
| 52 <sup>48</sup>     | 89 | F  | 2002      | China | Hong Kong         | NR                          | Mouth                                           | Manual removal, surgical removal, broad-spectrum antibiotics therapy | Multiple underlying illnesses, stroke, tube feeding, cardiovascular disease, bedridden, Infection: pulmonary tuberculosis, herpes simplex stomatitis, chest infection                                                                                                                                        | Fever, ulcer, noticed larvae                                                                                                    | Death (Congestive heart failure and nosocomial chest infection)** |
| 53 <sup>18</sup>     | 90 | F  | 2003      | China | Hong Kong         | RCHE                        | Eye: right orbit, right upper and lower eyelids | Surgical removal                                                     | Multiple underlying illnesses, COPD, dementia,bedridden, squamous cell carcinoma of eyelid with ulcer, infections: old tuberculosis and aspergillosis                                                                                                                                                        | Bleeding, discharge, noticed larvae, necrosis, severe tissues and/or bone destruction: eyeball and the ocular tissues destroyed | Death (COPD and Myocardial infarction)**                          |
| 54 <sup>26</sup>     | 89 | F  | 2002      | China | Hong Kong         | Nursing home                | Mouth: palate, jaw                              | Manual removal, surgical removal                                     | Stroke, dementia, bedridden, tube feeding                                                                                                                                                                                                                                                                    | Noticed larvae                                                                                                                  | Death (Pneumonia)**                                               |
| 55 <sup>26</sup>     | 69 | F  | 2002      | China | Hong Kong         | Nursing home                | Mouth: palate, jaw                              | Manual removal, surgical removal                                     | Stroke, dementia, bedridden, tube feeding, oral ulcer                                                                                                                                                                                                                                                        | Bleeding                                                                                                                        | Recovery/discharged                                               |
| 56 <sup>26</sup>     | 88 | M  | 2002      | China | Hong Kong         | Nursing home                | Mouth: palate, jaw                              | Manual removal, surgical removal                                     | Dementia, bedridden, tube feeding                                                                                                                                                                                                                                                                            | Noticed larvae, ulcer, severe tissues and/or bone destruction: extensive destroy of tissues, bone and teeth                     | Recovery/discharged                                               |
| 57 <sup>26</sup>     | 77 | F  | 2002      | China | Hong Kong         | Nursing home                | Mouth: palate, subelavian sinus                 | NR                                                                   | Dementia, bedridden, tube feeding                                                                                                                                                                                                                                                                            | Noticed larvae, bleeding                                                                                                        | Death (Pneumonia)**                                               |
| 58 <sup>26</sup>     | 79 | F  | 2003      | China | Hong Kong         | Nursing home                | Perineal & inguinal regions: labia majora       | Manual removal                                                       | Hypertension, dementia, bedridden, tube feeding, wound: sacral bed sore                                                                                                                                                                                                                                      | Noticed larvae                                                                                                                  | Recovery/discharged                                               |
| 59 <sup>26</sup>     | 71 | M  | 2003      | China | Hong Kong         | Nursing home                | Limb: foot                                      | Manual removal, antibiotics, surgical removal and toe amputation     | Diabetes mellitus, diabetic foot ulcer, blindness                                                                                                                                                                                                                                                            | Fever, discharge, foul smell, noticed larvae, severe tissues and/or bone destruction                                            | Recovery/discharged                                               |
| 60 <sup>26</sup>     | 96 | M  | 2003      | China | Hong Kong         | Nursing home                | Mouth: hard palate, maxillary sinuses           | Manual removal, antibiotics                                          | Carcinoma of the prostate, dementia, bedridden                                                                                                                                                                                                                                                               | Fever, secondary infection                                                                                                      | Death (Pneumonia)**                                               |
| 61 <sup>104</sup>    | 90 | F  | 2004      | China | Hong Kong         | The elderly home            | Mouth                                           | Manual removal, surgical removal, antibiotics                        | Multiple underlying illnesses, bedridden, tube feeding, diabetes mellitus, hypertension, dementia and haemorrhagic stroke with limb contractures, bacterial infection                                                                                                                                        | Fever, swollen, bleeding, noticed larvae, necrosis                                                                              | Recovery                                                          |
| 62 <sup>105</sup>    | 68 | M  | 2005      | China | Hong Kong         | A street sleeper, poor, low | Limb: the right ankle                           | Suffocating agent: turpentine, surgical removal                      | Ulcer                                                                                                                                                                                                                                                                                                        | Ulcer, bleeding, noticed larvae                                                                                                 | Recovery/discharged                                               |
| 63 <sup>105</sup>    | 90 | F  | 2005      | China | Hong Kong         | NR                          | Mouth                                           | Manual removal, surgical removal, antibiotics                        | Mental illness, tube feeding, bedridden                                                                                                                                                                                                                                                                      | Ulcer, noticed larvae, necrosis                                                                                                 | Recovery/discharged                                               |
| 64 <sup>106</sup>    | 86 | F  | 2014      | China | Hong Kong         | Home, rural                 | Limb: left foot                                 | Manual removal, surgical removal, antibiotics                        | Left foot erythema, ulcer, infection                                                                                                                                                                                                                                                                         | Noticed larvae                                                                                                                  | Recovery                                                          |
| 65 <sup>106</sup>    | 74 | M  | 2014      | China | Hong Kong         | Rural                       | Limb: right foot                                | Manual removal, surgical removal, antibiotics                        | End-stage renal disease, right foot trauma, bacterial infections                                                                                                                                                                                                                                             | Noticed larvae                                                                                                                  | Recovery                                                          |
| 66 <sup>106</sup>    | 43 | M  | 2014      | China | Hong Kong         | Low                         | Limb                                            | Manual removal, surgical removal                                     | Multiple underlying illnesses, neurological disorder: cognitive deficits, severe axonal mixed poluneuropathy involving his lower limbs, thyroid disorder: thyrotoxic hypokalemic periodic paralysis, postradioactive iodine hypothyroidism, infection: hemolytic streptococcal infective endocarditis, wound | Noticed larvae, necrosis                                                                                                        | Recovery/discharged                                               |
| 67 <sup>106</sup>    | 54 | M  | 2014      | China | Hong Kong         | Low                         | Limb: left lower shin                           | Manual removal, surgical removal, antibiotics,                       | Chronic dermatitis                                                                                                                                                                                                                                                                                           | Noticed larvae, necrosis                                                                                                        | Recovery/discharged                                               |
| 68 <sup>37</sup>     | 61 | F  | 2004      | China | Hong Kong         | NR                          | Torso: right breast                             | Manual removal, surgical removal                                     | Invasive lobular carcinoma                                                                                                                                                                                                                                                                                   | Unbearable pain, foul smell, necrosis, ulcer, discharge, bleeding, noticed larvae                                               | Recovery/discharged                                               |
| 69-85 <sup>107</sup> | -  | -  | 2002-2008 | China | Hong Kong         | -                           | -                                               | -                                                                    | -                                                                                                                                                                                                                                                                                                            | -                                                                                                                               | -                                                                 |
| 86 <sup>14</sup>     | 27 | F  | 1976      | China | Guangxi           | Low                         | Perineal & inguinal regions                     | NR                                                                   | Postpartum lochia                                                                                                                                                                                                                                                                                            | Discharge, pruritis: pruritus vulvae, tunnels                                                                                   | Recovery/discharged                                               |
| 87 <sup>14</sup>     | 2  | M  | 1980      | China | Guixian, Guangxi  | Low, rural                  | Ear                                             | NR                                                                   | Ear infection                                                                                                                                                                                                                                                                                                | Discharge, noticed larvae                                                                                                       | Recovery/discharged                                               |
| 88 <sup>14</sup>     | 6  | F  | 1980      | China | Tianyang, Guangxi | Low, rural                  | Ear                                             | NR                                                                   | Ear infection                                                                                                                                                                                                                                                                                                | Noticed larvae                                                                                                                  | Recovery/discharged                                               |
| 89 <sup>14</sup>     | 37 | F  | 1979      | China | Daxin, Guangxi    | Low, rural                  | Perineal & inguinal regions                     | NR                                                                   | Infection: vulvitis and vaginis                                                                                                                                                                                                                                                                              | Tunnels, honeycomb-like both side of the labia majora, noticed larvae                                                           | Recovery/discharged                                               |
| 90 <sup>14</sup>     | 49 | F  | 1978      | China | Guiping, Guangxi  | Low, rural                  | Nose                                            | NR                                                                   | Infection: atrophic rhinitis                                                                                                                                                                                                                                                                                 | Bleeding: rhinorrhagia, cold, fever, headache, noticed larvae                                                                   | Recovery/discharged                                               |
| 91 <sup>14</sup>     | 41 | F  | 1973      | China | Yiming, Guangxi   | Low, rural                  | Perineal & inguinal regions: the right of anus  | NR                                                                   | Miscarriage                                                                                                                                                                                                                                                                                                  | Tunnels                                                                                                                         | Recovery/discharged                                               |
| 92 <sup>14</sup>     | 1  | M  | 1966      | China | Nanning, Guangxi  | City                        | Ear: left ear canal                             | NR                                                                   | Ear infection                                                                                                                                                                                                                                                                                                | Noticed larvae                                                                                                                  | Recovery/discharged                                               |
| 93 <sup>14</sup>     | 8  | M  | 1959      | China | Pinxiang, Guangxi | City                        | Nose                                            | NR                                                                   | Infection: rhinitis                                                                                                                                                                                                                                                                                          | Fever, discharge, foul smell, tunnels                                                                                           | Recovery/discharged                                               |
| 94 <sup>62</sup>     | 56 | F  | 1958      | China | Nanning, Guangxi  | Low, rural                  | Nose                                            | Manual removal                                                       | Infection: rhinitis                                                                                                                                                                                                                                                                                          | Fever, discharge, foul smell, headache, ulcer, noticed larvae                                                                   | Recovery/discharged                                               |
| 95 <sup>2</sup>      | NR | NR | 1970      | China | Yunnan            | NR                          | Nose                                            | NR                                                                   | NR                                                                                                                                                                                                                                                                                                           | NR                                                                                                                              | Recovery/discharged                                               |
| 96 <sup>6</sup>      | 84 | F  | 2009      | China | Lufeng, Guangdong | Low, rural                  | Limb                                            | Manual removal, suffocating agent                                    | Hypertension, stroke                                                                                                                                                                                                                                                                                         | Large ulcer, severe pain, discharge, inflammation, oedema, sensation of moving larvae, noticed larvae, pruritus                 | Recovery/discharged                                               |
| 97 <sup>63</sup>     | 54 | F  | 2007      | China | Jiangxi           | Low, rural                  | Mouth, Nose                                     | Manual removal, antibiotics                                          | No                                                                                                                                                                                                                                                                                                           | Huge ulcer between the hard and soft palate, connected with nose, necrosis, intense pain, eating difficulty, bleeding           | Recovery/discharged                                               |

|                    |    |    |      |       |                   |            |                                               |                                                                                                                                                                                                   |                                                                                                                                         |                                                                                                                                                                                                                                                                                                                          |                                                                                                                     |
|--------------------|----|----|------|-------|-------------------|------------|-----------------------------------------------|---------------------------------------------------------------------------------------------------------------------------------------------------------------------------------------------------|-----------------------------------------------------------------------------------------------------------------------------------------|--------------------------------------------------------------------------------------------------------------------------------------------------------------------------------------------------------------------------------------------------------------------------------------------------------------------------|---------------------------------------------------------------------------------------------------------------------|
| 98 <sup>61</sup>   | 49 | F  | 1981 | China | Quanzhou, Fujian  | Low, rural | Perineal & inguinal regions                   | Surgical removal                                                                                                                                                                                  | NR                                                                                                                                      | Pruritus vulvae, pain, discharge, edema, tunnels, noticed larvae                                                                                                                                                                                                                                                         | Recovery/discharged                                                                                                 |
| 99 <sup>64</sup>   | 56 | M  | 2015 | China | Wei County, Hebei | Low, rural | Mouth                                         | Manual removal                                                                                                                                                                                    | No                                                                                                                                      | Pain, edema, redness, necrosis, ulcer, noticed larvae                                                                                                                                                                                                                                                                    | Recovery/discharged                                                                                                 |
| 100 <sup>52</sup>  | 45 | F  | 2006 | India | New Delhi         | Low        | Perineal & inguinal regions                   | Manual removal, suffocating agent: turpentine                                                                                                                                                     | Carcinoma cervix, bladder incontinence, ulcer                                                                                           | Pruritus, pain, noticed larvae                                                                                                                                                                                                                                                                                           | Discharged                                                                                                          |
| 101 <sup>108</sup> | 22 | M  | 2014 | India | Delhi             | Low        | Mouth                                         | Manual removal, suffocating agent, antibiotics, insecticides: ivermectin                                                                                                                          | Neurological disorder and mental illness: cerebral palsy, severe mental retardation, quadriplegia, and kyphoscoliosis, seizure disorder | Noticed larvae, ulcer, swollen                                                                                                                                                                                                                                                                                           | Recovery/discharged                                                                                                 |
| 102 <sup>109</sup> | 71 | NR | 1990 | India | Delhi             | Low        | Eye                                           | Manual removal                                                                                                                                                                                    | Infection: herpes zoster ophthalmicus on the face                                                                                       | NR                                                                                                                                                                                                                                                                                                                       | NR                                                                                                                  |
| 103 <sup>56</sup>  | 65 | M  | 2016 | India | Chhattisgarh      | Low        | Right eye                                     | Manual removal, surgical removal, suffocating agent: turpentine oil, antibiotics, insecticides: ivermectin                                                                                        | Debility, immunocompromised, an empty orbital socket postevisceration                                                                   | Pain, redness, discharge, swollen, necrosis, ulcer                                                                                                                                                                                                                                                                       | Recovery/discharged                                                                                                 |
| 104 <sup>38</sup>  | 65 | F  | 1994 | India | Shertallai        | Low        | Limb: left foot                               | Antibiotics                                                                                                                                                                                       | Infection:filarial, lymphoedema with dermatosclerosis and papillomatosis, ulcer                                                         | Fever, chill, pain, discharge, noticed larvae                                                                                                                                                                                                                                                                            | Recovery                                                                                                            |
| 105 <sup>38</sup>  | 60 | M  | 1994 | India | Shertallai        | Low        | Limb: left leg                                | Manual removal, suffocating agent: turpentine, antibiotics                                                                                                                                        | Infection:filarial, lymphoedema with ulcers in both legs                                                                                | Fever, chill, discharge                                                                                                                                                                                                                                                                                                  | Recovery                                                                                                            |
| 106 <sup>38</sup>  | 33 | M  | 1994 | India | Pondicherry       | Low        | Limb: left ankle                              | Manual removal, antibiotics                                                                                                                                                                       | Infection:filarial lymphoedema in the left leg, ulcer                                                                                   | Severe pain, reddish, noticed larvae                                                                                                                                                                                                                                                                                     | Recovery                                                                                                            |
| 107 <sup>110</sup> | 60 | M  | 2011 | India | Punjab            | Low        | Mouth                                         | Manual removal                                                                                                                                                                                    | Squamous cell carcinoma in oral cavity, ulcer, perforation of cheek                                                                     | Severe pain, foul smell, discharge, noticed larvae                                                                                                                                                                                                                                                                       | Recovery                                                                                                            |
| 108 <sup>110</sup> | 32 | F  | 2011 | India | Punjab            | Low        | Face, mouth                                   | Manual removal, surgical removal, suffocating agent: turpentine                                                                                                                                   | Squamous cell carcinoma in oral cavity, ulcer, perforation of cheek                                                                     | Swollen, noticed larvae                                                                                                                                                                                                                                                                                                  | Recovery                                                                                                            |
| 109 <sup>27</sup>  | 50 | F  | 2005 | India | Punjab            | Low        | Limb                                          | NR                                                                                                                                                                                                | Diabetes mellitus, diabetic foot, trauma, numbness                                                                                      | Noticed larvae                                                                                                                                                                                                                                                                                                           | NR                                                                                                                  |
| 110 <sup>27</sup>  | 30 | M  | 2006 | India | Patiala           | Low        | Limb                                          | Surgical removal, left foot amputation                                                                                                                                                            | Trauma, diabetes mellitus, diabetic foot, ulcer                                                                                         | High fever, discharge, noticed larvae, severe tissues and/or bone destruction: a bone deep gangrenous wound, necrosis                                                                                                                                                                                                    | NR                                                                                                                  |
| 111 <sup>51</sup>  | 12 | M  | 2012 | India | NR                | Low        | Mouth                                         | Manual removal, suffocating agent: cotton bud impregnated with turpentine                                                                                                                         | Neurological disorder                                                                                                                   | Swollen, tunnels, noticed larvae, foul smell                                                                                                                                                                                                                                                                             | Recovery                                                                                                            |
| 112 <sup>111</sup> | 22 | M  | 2011 | India | Telangana         | Low        | Mouth                                         | Manual removal                                                                                                                                                                                    | Mental illness                                                                                                                          | Pain, irritation, distress, bleeding, inflammation, abscess, ulcer                                                                                                                                                                                                                                                       | Recovery/discharged                                                                                                 |
| 113 <sup>111</sup> | 90 | F  | 2011 | India | Telangana         | Low        | Nose                                          | Manual removal, suffocating agent                                                                                                                                                                 | Hypertension, diabetes mellitus                                                                                                         | Pain, distress, edema                                                                                                                                                                                                                                                                                                    | Recovery/discharged                                                                                                 |
| 114 <sup>112</sup> | 4  | F  | 2014 | India | Madhya Pradesh    | Low        | Perineal & inguinal regions: Prolapsed rectum | Manual removal, suffocating agent                                                                                                                                                                 | NR                                                                                                                                      | Noticed larvae, ulceration,fever, inflammation                                                                                                                                                                                                                                                                           | Recovery/discharged                                                                                                 |
| 115 <sup>31</sup>  | 73 | M  | 2013 | India | Chennai           | NR         | Tracheostomy                                  | Manual removal                                                                                                                                                                                    | Diabetes mellitus, carcinoma supraglottis, tracheostomy                                                                                 | Bleeding, discharge, ulcer, noticed larvae, edema, foul smell                                                                                                                                                                                                                                                            | Recovery/discharged                                                                                                 |
| 116 <sup>113</sup> | 33 | M  | 2010 | India | West Bengal       | Low        | Perineal & inguinal regions                   | Manual removal, antibiotics                                                                                                                                                                       | Dermatitis, giant perigenital lesion, ulcer, mental illness                                                                             | Noticed larvae, discharge                                                                                                                                                                                                                                                                                                | NR                                                                                                                  |
| 117 <sup>50</sup>  | 42 | F  | 2015 | India | Assam             | Low        | Eye: right eye                                | Manual removal, surgical removal, suffocating agent: turpentine, antibiotics                                                                                                                      | Trauma                                                                                                                                  | Swollen, itch, bleeding, foul smell, discharge, noticed larvae                                                                                                                                                                                                                                                           | Recovery/discharged                                                                                                 |
| 118 <sup>114</sup> | 12 | F  | 2009 | India | Madhya Pradesh    | NR         | Mouth: gum                                    | Manual removal, surgical removal, antibiotics                                                                                                                                                     | Gingival lesion, ulcer                                                                                                                  | Pain, swollen, bleeding, noticed larvae                                                                                                                                                                                                                                                                                  | Recovery                                                                                                            |
| 119 <sup>115</sup> | 70 | F  | 2014 | India | NR                | Low        | Mouth: anterior maxilla                       | Manual removal, surgical removal, suffocating agent: turpentine, antibiotics                                                                                                                      | Malnutrition                                                                                                                            | Swollen, pain, necrosis, severe tissues and/or bone destruction                                                                                                                                                                                                                                                          | Recovery                                                                                                            |
| 120 <sup>57</sup>  | 12 | M  | 2010 | India | NR                | Low        | Mouth                                         | Manual removal, suffocating agent: turpentine, insecticides: ivermectin                                                                                                                           | Neurological disorder: seizures, unconscious state, malnutrition, debility, tube feeding, ulcer, mouth breathing, incompetent lips      | Swollen, reddish, tunnels, noticed larvae                                                                                                                                                                                                                                                                                | Recovery/discharged                                                                                                 |
| 121 <sup>116</sup> | 40 | M  | 2013 | India | NR                | Low        | Mouth                                         | Manual removal, surgical removal, insecticides: ivermectin, antibiotics                                                                                                                           | NR                                                                                                                                      | Pain, swollen, noticed larvae, inflammation, fever, bone loss                                                                                                                                                                                                                                                            | Recovery/discharged                                                                                                 |
| 122 <sup>117</sup> | 14 | M  | 2010 | India | NR                | Low        | Mouth                                         | Manual removal, suffocating agent: turpentine, antibiotics                                                                                                                                        | Mental illness, neurological disorder: seizure, ulcer                                                                                   | Swollen, severe pain, fever, apprehensive, necrosis, noticed larvae                                                                                                                                                                                                                                                      | Recovery/discharged                                                                                                 |
| 123 <sup>118</sup> | 51 | F  | 2013 | India | NR                | Low        | Mouth                                         | Manual removal, surgical removal, suffocating agent: turpentine, antibiotics                                                                                                                      | Infection: filarial lymphedema and elephantiasis, leprosy, incompetent lips, advanced periodontal disease                               | Pain, sensation of moving larvae, noticed larvae, inflammation, discharge, tunnels, bone destruction in teeth                                                                                                                                                                                                            | Recovery/discharged                                                                                                 |
| 124 <sup>54</sup>  | 35 | F  | 2012 | India | NR                | Low        | Mouth                                         | Manual removal, surgical removal, suffocating agent: cottons buds impregnated with turpentine oil, insecticides: ivermectin, antibiotics                                                          | Mental illness, mouth breathing                                                                                                         | Severe pain, swollen, noticed larvae, foul smell, tunnels                                                                                                                                                                                                                                                                | Recovery/discharged                                                                                                 |
| 125 <sup>32</sup>  | 46 | F  | 2008 | India | Ariankuppam       | Low        | Tracheostomy                                  | Manual removal, suffocating agent: turpentine                                                                                                                                                     | Advanced carcinoma of hypopharynx and neck, tracheostomy                                                                                | Noticed larvae                                                                                                                                                                                                                                                                                                           | NR                                                                                                                  |
| 126 <sup>32</sup>  | 52 | F  | 2008 | India | Tamil Nadu        | Low        | Tracheostomy                                  | Manual removal, surgical removal, antibiotics                                                                                                                                                     | Carcinoma of larynx, tracheostomy, bacterial infections                                                                                 | Noticed larvae                                                                                                                                                                                                                                                                                                           | Discharged                                                                                                          |
| 127 <sup>32</sup>  | 62 | M  | 2008 | India | Tamil Nadu        | Low        | Face                                          | NR                                                                                                                                                                                                | Carcinoma of cheek                                                                                                                      | Discharge, foul smell                                                                                                                                                                                                                                                                                                    | NR                                                                                                                  |
| 128 <sup>32</sup>  | 75 | M  | 2008 | India | Tamil Nadu        | Low        | Mouth                                         | NR                                                                                                                                                                                                | Ulcer, lip cancer                                                                                                                       | Bleeding, discharge, noticed larvae                                                                                                                                                                                                                                                                                      | NR                                                                                                                  |
| 129 <sup>16</sup>  | 30 | M  | 1991 | India | NR                | Low        | Limb: lower left leg                          | Manual removal                                                                                                                                                                                    | Ulcer, trauma, drug addict (heroin), infection: active cellulitis                                                                       | Mixed infestation by <i>Chrysomya bezziana</i> and <i>Sarcophaga sp.</i> , severe pain, noticed larvae, foul smell, discharge, severe tissues and/or bone destruction: a bone-beep non-healing ulcer with 10cm×10cm in size                                                                                              | NR                                                                                                                  |
| 130 <sup>119</sup> | 14 | M  | 2011 | India | NR                | Low        | Perineal & inguinal regions                   | Manual removal, antibiotics, suffocating agent: paraffin                                                                                                                                          | Infections: perianal codylomata acuminata, bacterial infections                                                                         | Pain, discharge, itch, foul smell, bleeding, necrosis, noticed larvae                                                                                                                                                                                                                                                    | NR                                                                                                                  |
| 131 <sup>120</sup> | 32 | F  | 2011 | India | NR                | Low        | Mouth: hard palate and gums                   | Manual removal, insecticides: ivermectin, surgical removal                                                                                                                                        | Mental illness, mouth breathing                                                                                                         | Extensive necrosis, bleeding, foul smell, pain, swollen                                                                                                                                                                                                                                                                  | Recovery/discharged                                                                                                 |
| 132 <sup>121</sup> | -  | -  | 1971 | India | -                 |            | Mouth                                         | -                                                                                                                                                                                                 | -                                                                                                                                       | -                                                                                                                                                                                                                                                                                                                        | -                                                                                                                   |
| 133 <sup>33</sup>  | 78 | M  | 2011 | India | NR                | Low        | Tracheostomy                                  | Manual removal, surgical removal, suffocating agent: turpentine soaked gauze (but need caution while using it around the tracheostoma, a high risk of chemical pneumonitis), antibiotics          | Head injury, trauma, tracheostomy, respiratory distress, bacterial infections                                                           | Foul smell, bleeding, discharge, noticed larvae                                                                                                                                                                                                                                                                          | Recovery/discharged                                                                                                 |
| 134 <sup>19</sup>  | 80 | F  | 1990 | India | NR                | Low        | Eye                                           | Manual removal,suffocating agent: turpentine, antibiotics                                                                                                                                         | No                                                                                                                                      | Bleeding, discharge, noticed larvae, inflammation, ulcer, foul smell, severe tissues and/or bone destruction: complete loss globe in two days                                                                                                                                                                            | Recovery/discharged                                                                                                 |
| 135 <sup>46</sup>  | 50 | F  | 2018 | India | NR                | Rural, low | Nose                                          | Manual removal, suffocating agent, antibiotic                                                                                                                                                     | Diabetes mellitus, nasal obstruction and epistaxis                                                                                      | Noticed larvae, bleeding, necrosis, discharge, tunnels, severe tissues and/or bone destruction: destroy of bony septum                                                                                                                                                                                                   | Recovery/discharged                                                                                                 |
| 136 <sup>5</sup>   | 35 | F  | 1909 | India | Assam             | Low        | Nose, eye, face, mouth                        | Thousands of screw-worms with several generations were found, removed by manual removal (including nose, eye, face and mouth), using suffocating agent(nose): turpentine, treatment: nasal douche | Multiple underlying illnesses, Infections: ankylostomiasis, malaria, bronchitis, anaemia, asthma                                        | Noticed larvae, fever, acute inflammation, Tunnels,oedema, bleeding, foul smell, discharge, pain, necrosis, severe tissues and/or bone destruction: from below the nostrils to halfway up to forehead. eyelids and cheeks., including subcutaneous tissue, muscles, mucous membrane, cartilage, periosteum and even bone | Death (exhaustion with rapid and heavy tissue destruction caused by a large number of maggots, and other underlying |

|                    |    |   |           |                    |                             |                      |                                                              |                                                                                                                                  |                                                                                                                                                            |                                                                                                                                                                                  |                                                                                       |  |  |  |  |  |  |  |  |  |                    |
|--------------------|----|---|-----------|--------------------|-----------------------------|----------------------|--------------------------------------------------------------|----------------------------------------------------------------------------------------------------------------------------------|------------------------------------------------------------------------------------------------------------------------------------------------------------|----------------------------------------------------------------------------------------------------------------------------------------------------------------------------------|---------------------------------------------------------------------------------------|--|--|--|--|--|--|--|--|--|--------------------|
|                    |    |   |           |                    |                             |                      |                                                              |                                                                                                                                  |                                                                                                                                                            |                                                                                                                                                                                  |                                                                                       |  |  |  |  |  |  |  |  |  | diseases worsen)** |
| 137 <sup>55</sup>  | 8  | M | 2018      | India              | NR                          | NR                   | Mouth: the posterior region of the jaw                       | Surgical removal, manual removal, suffocating agent: turpentine soaked gauze, antibiotics: amoxycillin, insecticides: ivermectin | Mental illness: mental retardation, malnutrition, infection: chronic pericoronitis                                                                         | Noticed larvae, necrosis                                                                                                                                                         | Recovery/discharged                                                                   |  |  |  |  |  |  |  |  |  |                    |
| 138 <sup>122</sup> | 3  | F | 2019      | India              | Punjab                      | Low                  | Scalp                                                        | Manual removal, suffocating agent: turpentine liniment, antibiotics                                                              | Trauma, anemia, infection                                                                                                                                  | High fever, severe pain, noticed larvae                                                                                                                                          | Recovery/discharged                                                                   |  |  |  |  |  |  |  |  |  |                    |
| 139 <sup>19</sup>  | 80 | F | 1990      | India              | NR                          | Low                  | Eye: globe                                                   | Manual removal, surgical removal, suffocating agent: turpentine                                                                  | Trauma, infection: endophthalmitis                                                                                                                         | A large ulcer of about 6 m× 2.5 cm, inflammation, bleeding, discharge, foul smell, Severe tissues and/or bone destruction: the globe completely destroyed in two days            | Discharged                                                                            |  |  |  |  |  |  |  |  |  |                    |
| 140 <sup>34</sup>  | 3  | F | 2011      | Iran               | Hormozgan                   | Low                  | Pharyngostomy                                                | Surgical removal, antibiotics                                                                                                    | Ingested aluminum hydroxide powder by accident, severe burns of oral cavity and esophagus, pharyngostomy tube                                              | Noticed larvae, swollen                                                                                                                                                          | Stable                                                                                |  |  |  |  |  |  |  |  |  |                    |
| 141 <sup>20</sup>  | 55 | F | 2013      | Iran               | Mazandaran                  | Low                  | Eye: left eye                                                | Surgical removal                                                                                                                 | Basal cell carcinoma                                                                                                                                       | Noticed larvae, pain, severe tissues and/or bone destruction: left eye completely destroyed                                                                                      | NR                                                                                    |  |  |  |  |  |  |  |  |  |                    |
| 142 <sup>123</sup> | 55 | M | 2002      | Iran               | Kashan                      | Low                  | Ear                                                          | Surgical removal, suffocating agent: chloroform-containing sterile oil, antibiotics                                              | Prolonged ear infection                                                                                                                                    | Pain, discharge                                                                                                                                                                  | Recovery/discharged                                                                   |  |  |  |  |  |  |  |  |  |                    |
| 143 <sup>21</sup>  | 87 | F | 2010      | Iran               | Khuzestan                   | Low                  | Eye: left orbit                                              | Manual removal, surgical removal, antibiotics                                                                                    | Multiple underlying illnesses, trauma, cancer, eyelid surgical removal due to skin cancer, bedridden, back injury, bladder and bowel incontinence          | Severe pain and necrosis, noticed larvae, swollen, redness, severe tissues and/or bone destruction: eyelids and eyeball completely destroyed                                     | Recovery/discharged                                                                   |  |  |  |  |  |  |  |  |  |                    |
| 144 <sup>35</sup>  | 87 | M | 2009      | Iran               | Fars                        | NR                   | Limb                                                         | NR                                                                                                                               | Multiple underlying illnesses, diabetes mellitus, diabetic feet ulcers, cardiovascular diseases                                                            | Severe itch                                                                                                                                                                      | NR                                                                                    |  |  |  |  |  |  |  |  |  |                    |
| 145 <sup>35</sup>  | 18 | M | 2009      | Iran               | Fars                        | Low                  | Mouth                                                        | Manual removal                                                                                                                   | Mental illness and neurological disorder: congenital cerebral palsy with quadriplegia and mental retardation, severe failure to thrive, oral lesion, ulcer | Pain, noticed larvae                                                                                                                                                             | Recovery/discharged                                                                   |  |  |  |  |  |  |  |  |  |                    |
| 146 <sup>124</sup> | 5  | M | 2007      | Iran               | Hormozgan                   | Low                  | Scalp                                                        | Surgical removal                                                                                                                 | NR                                                                                                                                                         | Severe headache , agitation, severe tissue destruction, wound, noticed larvae                                                                                                    | NR                                                                                    |  |  |  |  |  |  |  |  |  |                    |
| 147 <sup>47</sup>  | 74 | F | 2015      | Iran               | Khorasan Razavi             | NR                   | Nose                                                         | Surgical removal, antibiotics                                                                                                    | COPD, infections: pneumonia, severe sepsis                                                                                                                 | Noticed larvae in both nostrils, bleeding, perforation, fever                                                                                                                    | Death (underlying diseases worsen, severe sepsis, septic shock, multiorgan failure)** |  |  |  |  |  |  |  |  |  |                    |
| 148 <sup>22</sup>  | 90 | F | 2000      | Iran               | Andimeshk town              | Low                  | Eye                                                          | Manual removal, surgical removal and orbital exenteration                                                                        | Leukomatous lesion, the eyelid basal cell carcinoma, chronic eye infection                                                                                 | Severe tissue/bone destruction: ocluar rupture and larvae penetrate deep enough to involve the optic canal, noticed larvae, severe swollen, discharge, bleeding                  | NR                                                                                    |  |  |  |  |  |  |  |  |  |                    |
| 149 <sup>125</sup> | 36 | F | 1978      | Iran               | NR                          | NR                   | Perineal & inguinal regions                                  | Manual removal                                                                                                                   | Infection: appendicitis                                                                                                                                    | Severe abdominal pain, dysuria, noticed larvae                                                                                                                                   | Recovery/discharged                                                                   |  |  |  |  |  |  |  |  |  |                    |
| 150 <sup>126</sup> | -  | - | 1993      | Iran               | -                           | -                    | -                                                            | -                                                                                                                                | -                                                                                                                                                          | -                                                                                                                                                                                | -                                                                                     |  |  |  |  |  |  |  |  |  |                    |
| 151 <sup>127</sup> | 89 | M | 2012      | Iran               | NR                          | NR                   | Mouth                                                        | Manual removal, antibiotics                                                                                                      | Multiple underlying illnesses, non-Hodgkin lymphoma, dementia, infection: sepsis, immunocompromised                                                        | Fever, necrosis, noticed larvae                                                                                                                                                  | Death (Sepsis)**                                                                      |  |  |  |  |  |  |  |  |  |                    |
| 152 <sup>23</sup>  | 65 | F | 2009      | Iran               | NR                          | Low                  | Face, nose, nasal sinuses, mouth: upper lip, eye: left orbit | Manual removal, antibiotics,                                                                                                     | Facial squamous cell carcinoma, wound                                                                                                                      | Bleeding, pain, discharge, noticed larvae, ulcer, severe tissues and/or bone destruction: soft tissues malignancy, involving left orbit, nose, maxillary sinus and sphenoid bone | Discharged                                                                            |  |  |  |  |  |  |  |  |  |                    |
| 153 <sup>28</sup>  | 65 | M | 2002      | Malaysia           | Kuala Lumpur                | Low, rural           | Limb: right big toe                                          | Manual removal, surgical removal and amputation of the big toe                                                                   | Diabetic mellitus, diabetic foot ulcer                                                                                                                     | Inflammation, oedema, bleeding, foul smell, discharge, noticed larvae, severe tissues and/or bone destruction                                                                    | Recovery/discharged                                                                   |  |  |  |  |  |  |  |  |  |                    |
| 154 <sup>128</sup> | 80 | F | 2005      | Malaysia           | Perak                       | -                    | Nose                                                         | -                                                                                                                                | -                                                                                                                                                          | Bleeding: epistaxis, headache, noticed larvae                                                                                                                                    | -                                                                                     |  |  |  |  |  |  |  |  |  |                    |
| 155 <sup>129</sup> | 76 | F | 1980      | Malaysia           | -                           | Low                  | Perineal & inguinal regions                                  | -                                                                                                                                | Carcinoma of the rectum, ulcer                                                                                                                             | Foul smell                                                                                                                                                                       | -                                                                                     |  |  |  |  |  |  |  |  |  |                    |
| 156 <sup>130</sup> | 41 | M | 2006      | Malaysia           | NR                          | NR                   | Ear                                                          | Manual removal, antibiotics: amoxicillin                                                                                         | Mental illness                                                                                                                                             | Pain, bleeding, discharge, noticed larvae, sensation of moving larvae, inflammation                                                                                              | Recovery/discharged                                                                   |  |  |  |  |  |  |  |  |  |                    |
| 157 <sup>15</sup>  | 27 | F | 2012      | Malaysia           | Saunsar village             | Low, rural           | Perineal & inguinal regions: vagina                          | Manual removal, suffocating agent: a pack soaked with turpentine oil kept in vagina, antibiotics                                 | HIV and hepatitis virus infections, immunocompromised state, wound: left mediolateral episiotomy wound postnatal period                                    | Pain, irritation, edema, wound, noticed larvae                                                                                                                                   | Recovery/discharged                                                                   |  |  |  |  |  |  |  |  |  |                    |
| 158 <sup>17</sup>  | 55 | M | 2012      | Travel to Malaysia | Island offshore of Langkawi | middle class         | Scalp                                                        | Manual removal, antibiotics                                                                                                      | Chronic seborrhoeic eczema                                                                                                                                 | Pain, bleeding, noticed larvae, ulceration, sensation of moving larvae, itch                                                                                                     | Recovery/discharged                                                                   |  |  |  |  |  |  |  |  |  |                    |
| 159 <sup>131</sup> | 46 | F | 1952      | Sri Lanka          | NR                          | Low                  | Nose                                                         | Manual removal, suffocating agent: oil, plugging the nose with dextrose solution                                                 | Infection: sinusitis and rhinitis atrophicans, anemia                                                                                                      | Discharge, foul smell, headache, bleeding, fever, edema, severe tissue and/or bone destruction: septum defect, noticed larvae                                                    | Recovery/discharged                                                                   |  |  |  |  |  |  |  |  |  |                    |
| 160 <sup>131</sup> | 30 | F | 1951      | Sri Lanka          | NR                          | NR                   | Ear                                                          | Surgical removal, Manual removal, wound dressed with plugs soaked in 10% dextrose solution (dress every day)                     | Infection: otitis media chronica, conductive and nerve deafness, cholesteatomatous cavity                                                                  | Discharge, foul smell, bone destruction, pain                                                                                                                                    | Recovery/discharged                                                                   |  |  |  |  |  |  |  |  |  |                    |
| 161 <sup>36</sup>  | 73 | F | 1997      | Sri Lanka          | Colombo                     | Low                  | Limb: fourth toe, right foot                                 | Manual removal, suffocating agent: turpentine                                                                                    | Dermatitis, mental illness                                                                                                                                 | NR                                                                                                                                                                               | Discharged                                                                            |  |  |  |  |  |  |  |  |  |                    |
| 162 <sup>36</sup>  | 82 | F | 1997      | Sri Lanka          | Colombo                     | Low                  | Limb: right heel                                             | Manual removal, suffocating agent: turpentine                                                                                    | Dermatitis                                                                                                                                                 | NR                                                                                                                                                                               | Discharged                                                                            |  |  |  |  |  |  |  |  |  |                    |
| 163 <sup>36</sup>  | 64 | M | 1997      | Sri Lanka          | Colombo                     | Low                  | Limb: right big toe                                          | Manual removal, suffocating agent: turpentine                                                                                    | Dermatitis                                                                                                                                                 | NR                                                                                                                                                                               | Discharged                                                                            |  |  |  |  |  |  |  |  |  |                    |
| 164 <sup>36</sup>  | 11 | F | 1997      | Sri Lanka          | Colombo                     | Low                  | Scalp                                                        | Manual removal, suffocating agent: turpentine                                                                                    | Infection: scalp sepsis, ectoparasite: pediculosis, mental illness: mental retardation                                                                     | NR                                                                                                                                                                               | Discharged                                                                            |  |  |  |  |  |  |  |  |  |                    |
| 165 <sup>36</sup>  | 55 | F | 1997      | Sri Lanka          | Colombo                     | Low                  | Limb: dorsum of left foot                                    | Manual removal, suffocating agent: turpentine                                                                                    | Dermatitis                                                                                                                                                 | NR                                                                                                                                                                               | Discharged                                                                            |  |  |  |  |  |  |  |  |  |                    |
| 166 <sup>36</sup>  | 73 | M | 1997      | Sri Lanka          | Colombo                     | Low                  | Limb: right foot                                             | Manual removal, suffocating agent: turpentine                                                                                    | Ulcer, infections: leprosy, dermatitis                                                                                                                     | NR                                                                                                                                                                               | Discharged                                                                            |  |  |  |  |  |  |  |  |  |                    |
| 167 <sup>36</sup>  | 94 | M | 1997      | Sri Lanka          | Colombo                     | Low                  | Limb: left foot                                              | Manual removal, suffocating agent: turpentine                                                                                    | Dermatitis, senile debility                                                                                                                                | NR                                                                                                                                                                               | Discharged                                                                            |  |  |  |  |  |  |  |  |  |                    |
| 168 <sup>36</sup>  | 60 | M | 1997      | Sri Lanka          | Colombo                     | Low                  | Limb: foot                                                   | Manual removal, suffocating agent: turpentine                                                                                    | Ulcer                                                                                                                                                      | NR                                                                                                                                                                               | Discharged                                                                            |  |  |  |  |  |  |  |  |  |                    |
| 169 <sup>36</sup>  | 49 | M | 1997      | Sri Lanka          | Colombo                     | low                  | Limb: foot                                                   | Manual removal, suffocating agent: turpentine                                                                                    | Diabetes mellitus, diabetic ulcer                                                                                                                          | NR                                                                                                                                                                               | Discharged                                                                            |  |  |  |  |  |  |  |  |  |                    |
| 170 <sup>36</sup>  | 39 | M | 1997      | Sri Lanka          | Colombo                     | Low                  | Limb: foot                                                   | Manual removal, suffocating agent: turpentine                                                                                    | Trauma                                                                                                                                                     | NR                                                                                                                                                                               | Discharged                                                                            |  |  |  |  |  |  |  |  |  |                    |
| 171 <sup>36</sup>  | 65 | F | 1997      | Sri Lanka          | Colombo                     | Low                  | Limb: foot                                                   | Manual removal, suffocating agent: turpentine                                                                                    | Mental illness                                                                                                                                             | NR                                                                                                                                                                               | Discharged                                                                            |  |  |  |  |  |  |  |  |  |                    |
| 172 <sup>36</sup>  | 42 | M | 1997      | Sri Lanka          | Colombo                     | Low                  | NR                                                           | Manual removal, suffocating agent: turpentine                                                                                    | NR                                                                                                                                                         | NR                                                                                                                                                                               | Discharged                                                                            |  |  |  |  |  |  |  |  |  |                    |
| 173 <sup>36</sup>  | 73 | M | 1997      | Sri Lanka          | Colombo                     | Low                  | NR                                                           | Manual removal, suffocating agent: turpentine                                                                                    | NR                                                                                                                                                         | NR                                                                                                                                                                               | Discharged                                                                            |  |  |  |  |  |  |  |  |  |                    |
| 174 <sup>36</sup>  | -  | - | 1997      | Sri Lanka          | Colombo                     | Low                  | NR                                                           | Manual removal, suffocating agent: turpentine                                                                                    | NR                                                                                                                                                         | NR                                                                                                                                                                               | Discharged                                                                            |  |  |  |  |  |  |  |  |  |                    |
| 175 <sup>37</sup>  | 76 | M | 2016-2017 | Sri Lanka          | Penideniya, Kandy, KA       | Low,poor, rural area | Limb: right heel                                             | Manual removal                                                                                                                   | Diabetes mellitus, diabetic ulcer                                                                                                                          | NR                                                                                                                                                                               | Discharged                                                                            |  |  |  |  |  |  |  |  |  |                    |

|                      |                       |    |           |           |                                 |                       |                                               |                                               |                                                                                           |                                                                                                           |                     |
|----------------------|-----------------------|----|-----------|-----------|---------------------------------|-----------------------|-----------------------------------------------|-----------------------------------------------|-------------------------------------------------------------------------------------------|-----------------------------------------------------------------------------------------------------------|---------------------|
| 176 <sup>37</sup>    | 30                    | M  | 2016-2017 | Sri Lanka | Kandy city, KA                  | Middle class          | Limb: right heel                              | Manual removal                                | Diabetes mellitus, diabetic ulcer                                                         | NR                                                                                                        | Discharged          |
| 177 <sup>37</sup>    | 65                    | F  | 2016-2017 | Sri Lanka | Thalathuoya, KA                 | Low, poor, rural area | Limb: left leg 2nd digit                      | Manual removal                                | Wound                                                                                     | NR                                                                                                        | Discharged          |
| 178 <sup>37</sup>    | 92                    | M  | 2016-2017 | Sri Lanka | Muruthalawa, KA                 | Low, poor, rural area | Limb: right ankle                             | Manual removal                                | Mental illness, wound                                                                     | NR                                                                                                        | Discharged          |
| 179 <sup>37</sup>    | 39                    | M  | 2016-2017 | Sri Lanka | Wuraganthota, KA                | Low, poor, rural area | Limb: left calf                               | Manual removal                                | Infection: filarial lymphedema, wound                                                     | NR                                                                                                        | Discharged          |
| 180 <sup>37</sup>    | 65                    | M  | 2016-2017 | Sri Lanka | Galaha,KA                       | Low, poor, rural area | Torso: left buttock                           | Manual removal                                | Mental illness, wound                                                                     | NR                                                                                                        | Discharged          |
| 181 <sup>37</sup>    | 54                    | F  | 2016-2017 | Sri Lanka | Meepalawa,KA                    | Low, poor, rural area | Limb: right heel                              | Manual removal                                | Diabetes mellitus, diabetic ulcer                                                         | NR                                                                                                        | Discharged          |
| 182 <sup>37</sup>    | 39                    | M  | 2016-2017 | Sri Lanka | Hakgala,BA (Badulla)            | Low, poor, rural area | Limb: right foot                              | Manual removal                                | Diabetes mellitus, diabetic ulcer                                                         | NR                                                                                                        | Discharged          |
| 183 <sup>37</sup>    | 70                    | F  | 2016-2017 | Sri Lanka | Agarapathana, NU (Nuwara eliya) | Low, poor, rural area | Limb: left calf                               | Manual removal                                | Wound                                                                                     | NR                                                                                                        | Discharged          |
| 184 <sup>37</sup>    | 70                    | M  | 2016-2017 | Sri Lanka | Molagoda, KE (Keyalle)          | Low, poor, rural area | Limb: right heel                              | Manual removal                                | Diabetes mellitus, diabetic ulcer                                                         | NR                                                                                                        | Discharged          |
| 185 <sup>37</sup>    | 79                    | M  | 2016-2017 | Sri Lanka | Heeloya,BA                      | Low, poor, rural area | Perineal & inguinal regions: urogenital tract | Manual removal                                | Mental illness                                                                            | NR                                                                                                        | Discharged          |
| 186 <sup>37</sup>    | 75                    | F  | 2016-2017 | Sri Lanka | Kandy city, KA                  | Middle class          | Limb: left great toe                          | Manual removal                                | Diabetes mellitus, diabetic ulcer                                                         | NR                                                                                                        | Discharged          |
| 187 <sup>37</sup>    | 69                    | M  | 2016-2017 | Sri Lanka | Poonagala, BA                   | Low, poor, rural area | Limb: right foot                              | Manual removal                                | Diabetes mellitus, diabetic ulcer                                                         | NR                                                                                                        | Discharged          |
| 188 <sup>37</sup>    | 52                    | M  | 2016-2017 | Sri Lanka | Dewaragampola, KE               | Low, poor, rural area | Limb: left ankle                              | Manual removal                                | Diabetes mellitus, diabetic ulcer                                                         | NR                                                                                                        | Discharged          |
| 189 <sup>37</sup>    | 64                    | M  | 2016-2017 | Sri Lanka | Pallepola,KA                    | Low, poor, rural area | Limb: light ankle                             | Manual removal                                | Mental illness, wound                                                                     | NR                                                                                                        | Discharged          |
| 190 <sup>37</sup>    | 55                    | M  | 2016-2017 | Sri Lanka | Owatta,KE                       | Low, poor, rural area | Limb: left ankle                              | Manual removal                                | Diabetes mellitus, diabetic ulcer                                                         | NR                                                                                                        | Discharged          |
| 191 <sup>37</sup>    | 53                    | M  | 2016-2017 | Sri Lanka | Nayawela,KE                     | Low, poor, rural area | Limb: right leg 2-3 digits                    | Manual removal                                | Diabetes mellitus, diabetic ulcer                                                         | NR                                                                                                        | Discharged          |
| 192 <sup>37</sup>    | 61                    | M  | 2016-2017 | Sri Lanka | Mawanella town, KE              | Middle class          | Limb: left ankle                              | Manual removal                                | Diabetes mellitus, diabetic ulcer                                                         | NR                                                                                                        | Discharged          |
| 193 <sup>37</sup>    | 64                    | M  | 2016-2017 | Sri Lanka | Owaththa, KE                    | Low, poor, rural area | Limb: right calf                              | Manual removal                                | Diabetes mellitus, diabetic ulcer                                                         | NR                                                                                                        | Discharged          |
| 194 <sup>37</sup>    | 57                    | F  | 2016-2017 | Sri Lanka | Nayawela,KE                     | Low, poor, rural area | Torso: right buttock                          | Manual removal                                | Diabetes mellitus, diabetic ulcer                                                         | NR                                                                                                        | Discharged          |
| 195 <sup>37</sup>    | 45                    | F  | 2016-2017 | Sri Lanka | Uthuwankanda, KE                | Low, poor, rural area | Limb: right ankle                             | Manual removal                                | Diabetes mellitus, diabetic ulcer                                                         | NR                                                                                                        | Discharged          |
| 196 <sup>37</sup>    | 45                    | F  | 2016-2017 | Sri Lanka | Aranayake, KE                   | Low, poor, rural area | Scalp                                         | Manual removal                                | Mental illness, wound                                                                     | NR                                                                                                        | Discharged          |
| 197 <sup>37</sup>    | 48                    | F  | 2016-2017 | Sri Lanka | Medawala, KA                    | Low, poor, rural area | Limb: right calf                              | Manual removal                                | Infection: filarial lymphedema, wound                                                     | NR                                                                                                        | Discharged          |
| 198 <sup>37</sup>    | 51                    | M  | 2016-2017 | Sri Lanka | Nawalapitiya, KA                | Low, poor, rural area | Torso: umbilical                              | Manual removal                                | Diabetes mellitus                                                                         | NR                                                                                                        | Discharged          |
| 199 <sup>37</sup>    | 64                    | M  | 2016-2017 | Sri Lanka | Pujapitiya,KA                   | Low, poor, rural area | Limb: right ankle                             | Manual removal                                | Diabetes mellitus, wound                                                                  | NR                                                                                                        | Discharged          |
| 200 <sup>37</sup>    | 72                    | F  | 2016-2017 | Sri Lanka | Galagedara,KA                   | Low, poor, rural area | Limb: left ankle                              | Manual removal                                | Diabetes mellitus, diabetic ulcer                                                         | NR                                                                                                        | Discharged          |
| 201 <sup>37</sup>    | 51                    | M  | 2016-2017 | Sri Lanka | Aranayake,KA                    | Low, poor, rural area | Limb: right great toe                         | Manual removal                                | Wound                                                                                     | NR                                                                                                        | Discharged          |
| 202 <sup>132</sup>   | 55                    | F  | 2019      | Indonesia | NR                              | Low                   | Nose, eye                                     | Surgical removal, manual removal, antibiotics | Diabetes mellitus, diabetic neuropathy, infection: pansinusitis and right pleuropneumonia | Necrosis, ulcer, edema, severe tissues and/or bone destruction: destroy of nasal septum and bone, abscess | Discharged          |
| 203 <sup>49</sup>    | 9                     | M  | 2008      | Indonesia | Kalimantan                      | NR                    | Eye, ear                                      | Surgical removal                              | Ear infection                                                                             | Bleeding, discharge, noticed larvae, inflammation, wound                                                  | Recovery/discharged |
| 204 <sup>133</sup>   | 72                    | M  | 2009      | Laos      | Luang Namtha                    | Low                   | Limb: left lower leg                          | Surgical removal, antibiotics                 | Infections: chromoblastomycosis, cellulitis, leprosy, ectoparasite: leech bites, lesions  | Noticed larvae, discharge, swollen, pain, ulcer                                                           | Recovery/discharged |
| 205 <sup>134</sup>   | 5                     | F  | 2009      | Pakistan  | Peshawar                        | Poor, low             | Perineal & inguinal regions: urogenital tract | NR                                            | NR                                                                                        | Pain, vaginal itch, dysuria, noticed larvae on the bed, discharge, ulcer                                  | Recovery/discharged |
| 206 <sup>135</sup>   | -                     | -  | 1959      | DRC       | -                               | --                    | -                                             | -                                             | -                                                                                         | -                                                                                                         | -                   |
| 207 <sup>135</sup>   | -                     | -  | 1959      | DRC       | -                               | -                     | -                                             | -                                             | -                                                                                         | -                                                                                                         | -                   |
| 208-215 <sup>†</sup> | NR                    | NR | 2007,2008 | Yemen     | NR                              | NR                    | NR                                            | NR                                            | NR                                                                                        | NR                                                                                                        | NR                  |
| 216 <sup>†</sup>     | New born <sup>†</sup> | NR | 1949      | PNG       | Western Highlands               | NR                    | NR                                            | NR                                            | NR                                                                                        | NR                                                                                                        | NR                  |
| 217 <sup>†</sup>     | NR                    | F  | 1951      | PNG       | New Ireland                     | NR                    | Perineal & inguinal regions                   | NR                                            | NR                                                                                        | NR                                                                                                        | NR                  |
| 218 <sup>†</sup>     | NR                    | M  | 1951      | PNG       | New Ireland                     | NR                    | Torso                                         | NR                                            | NR                                                                                        | NR                                                                                                        | NR                  |
| 219 <sup>†</sup>     | 14                    | M  | 1961      | PNG       | Easternn Highlands              | NR                    | Face                                          | NR                                            | NR                                                                                        | NR                                                                                                        | NR                  |
| 220 <sup>†</sup>     | NR                    | M  | 1963      | PNG       | Easternn Highlands              | NR                    | Ear                                           | NR                                            | NR                                                                                        | NR                                                                                                        | NR                  |
| 221 <sup>†</sup>     | NR                    | F  | 1963      | PNG       | Easternn Highlands              | NR                    | Ear                                           | NR                                            | NR                                                                                        | NR                                                                                                        | NR                  |
| 222 <sup>†</sup>     | NR                    | F  | 1979      | PNG       | Morobe                          | NR                    | Eye                                           | NR                                            | NR                                                                                        | NR                                                                                                        | NR                  |
| 223 <sup>†</sup>     | 5                     | M  | 1982      | PNG       | Western Province                | NR                    | NR                                            | NR                                            | NR                                                                                        | NR                                                                                                        | NR                  |
| 224 <sup>†</sup>     | 10                    | M  | 1983      | PNG       | Western Province                | NR                    | Scalp                                         | NR                                            | NR                                                                                        | NR                                                                                                        | NR                  |

|                            |    |    |           |               |            |     |                  |                               |                                                                                                                                                                                                                                                        |                                                                                                                                    |            |
|----------------------------|----|----|-----------|---------------|------------|-----|------------------|-------------------------------|--------------------------------------------------------------------------------------------------------------------------------------------------------------------------------------------------------------------------------------------------------|------------------------------------------------------------------------------------------------------------------------------------|------------|
| 225 <sup>136</sup>         | NR | NR | 1982      | Saudi Arabia  | NR         | NR  | Nose             | NR                            | NR                                                                                                                                                                                                                                                     | NR                                                                                                                                 |            |
| 226 <sup>24</sup>          | 65 | M  | 1985      | Saudi Arabia  | NR         | Low | Eye: globe       | Surgical removal, antibiotics | Multiple underlying illnesses, stroke, trauma, ulcers, bacterial infections, mental illness and neurological disorder: right-sided hemiparasis and mental retardation, superficial corneal pannus, stellate conjunctival scarring, and mature cataract | Increasing pain, inflammation, discharge, swollen, noticed larvae, severe tissues and/or bone destruction: totally destroyed orbit | Discharged |
| 227 <sup>137</sup>         | 94 | F  | 2014      | Thailand      | Chiang Mai | Low | Eye: right orbit | Surgical removal              | Bedridden, right eye infection                                                                                                                                                                                                                         | Right eyelid swollen, itch, ulcer, noticed larvae, bleeding, discharge, necrosis                                                   | Discharged |
| 228-286 <sup>138-139</sup> | -  | -  | 1920-1922 | India         | -          | -   | -                | -                             | -                                                                                                                                                                                                                                                      | -                                                                                                                                  | -          |
| 287 <sup>140</sup>         | -  | -  | 1929      | Cote d'Ivoire | -          | -   | Face             | -                             | -                                                                                                                                                                                                                                                      | -                                                                                                                                  | -          |
| 288 <sup>141</sup>         | -  | -  | 1932      | Kenya         | -          | -   | Limb: foot       | -                             | -                                                                                                                                                                                                                                                      | -                                                                                                                                  | -          |
| 289 <sup>142</sup>         | -  | -  | 1944      | Uganda        | -          | -   | Eye: orbit       | -                             | -                                                                                                                                                                                                                                                      | -                                                                                                                                  | -          |
| 290 <sup>142</sup>         | -  | -  | 1944      | Uganda        | -          | -   | Nose             | -                             | -                                                                                                                                                                                                                                                      | -                                                                                                                                  | -          |
| 291 <sup>142</sup>         | -  | -  | 1944      | Uganda        | -          | -   | Limb: foot       | -                             | -                                                                                                                                                                                                                                                      | -                                                                                                                                  | -          |

COPD=Chronic obstructive pulmonary disease; DRC=Democratic Republic of the Congo; PNG=Pupua New Guinea; RCHE=a residential care home for the elderly

\* Case recorded by Zhou et al in Guangdong Province, China

<sup>†</sup> Spradbery et al Per.comm.

<sup>‡</sup> Seveal strikes on vavels of new born children

\*\*reported cause of death

## References

- Center For Health Protection. A case of *Chrysomya bezziana* infestation in a breast mass. Communicable Disease Watch. 2005;2:2.
- Center For Health Protection. A local case of *Chrysomya bezziana* infestation. Communicable Disease Watch. 2005;2:95.
- Center For Health Protection. A case of *Chrysomya bezziana* infestation. Communicable Disease Watch. 2005;2:83.
- Center for Health Protection. Public reminded to guard against *Chrysomya bezziana* infestation. Available from: <https://www.chp.gov.hk/en/features/2178.html>.
- Center for Health Protection. A case of human *Chrysomya bezziana* infestation confirmed. Available from: <https://www.chp.gov.hk/en/features/2506.html>.
- Center for Health Protection. A case of human myiasis under investigation. Available from: <https://www.chp.gov.hk/en/features/6811.html>.
- Center for Health Protection. Case of human *Chrysomya bezziana* infestation under investigation. Available from: <http://www.info.gov.hk/gia/general/200604/07/P200604070245.html>.
- Center For Health Protection. A case of *Chrysomya bezziana* infestation. Communicable Disease Watch. 2006;3:22-23.
- Center For Health Protection. A case of human myiasis reported. Communicable Disease Watch. 2007;4:22.
- Center For Health Protection. A confirmed case of human myiasis. Communicable Disease Watch. 2010;7:66.
- Center For Health Protection. Two confirmed cases of human myiasis. Communicable Disease Watch. 2010;7:91.
- Center For Health Protection. Two confirmed cases of human myiasis. Communicable Disease Watch. 2010;7:105.
- Center For Health Protection. A confirmed case of human myiasis. Communicable Disease Watch. 2011;8:5.
- Center For Health Protection. A case of human myiasis. Communicable Disease Watch. 2011;8:66.
- Center For Health Protection. Two cases of human myiasis. Communicable Disease Watch. 2011;8:99.
- Center For Health Protection. A case of human myiasis. Communicable Disease Watch. 2011;8:15.
- Center For Health Protection. A case of human myiasis. Communicable Disease Watch. 2011;8:24.
- Center For Health Protection. A confirmed local recurrent case of human myiasis. Communicable Disease Watch. 2012;9:1.
- Center For Health Protection. Four sporadic cases of human myiasis. Communicable Disease Watch. 2012;9:90-91.
- Center For Health Protection. Two cases of human myiasis. Communicable Disease Watch. 2013;10:104.
- Center For Health Protection. A case of human myiasis. Communicable Disease Watch. 2013;10:7.
- Center For Health Protection. A case of human myiasis.Communicable Disease Watch. 2013;10:92.
- Center For Health Protection. A case of human myiasis. Communicable Disease Watch. 2013;10:88.
- Center For Health Protection. A sporadic case of human myiasis. Communicable Disease Watch. 2015;12:9.
- Center For Health Protection. A case of human myiasis.Communicable Disease Watch. 2015;12:67.
- Center For Health Protection. A case of human myiasis.Communicable Disease Watch. 2015;12:75.
- Center For Health Protection. A confirm local case of human myiasis.Communicable Disease Watch. 2015;12:32.
- Center For Health Protection. A cofirmed local case of human myiasi.Communicable Disease Watch. 2015;12:41.
- Center For Health Protection. A sporadic local case of human myiasis in a residential care home for the elderly (RCHE). Communicable Disease Watch. 2015;12:110.
- Center For Health Protection. Two cases of human myiasis. Communicable Disease Watch. 2016;13:7.
- Center For Health Protection. Two local cases of human myiasis. Communicable Disease Watch. 2016;13:50.
- Center For Health Protection. A sporadic case of human myiasis. Communicable Disease Watch. 2016;13:100.
- Center For Health Protection. A sporadic case of human myiasis. Communicable Disease Watch. 2017;14:18.
- Center For Health Protection. Two local cases of human myiasis. Communicable Disease Watch. 2018;15(19):84.
- Poon T. Oral myiasis in Hong Kong - a case report. HK Pract. 2006;28:388-393.
- Chan T, Yan K, Yien L, Yuen W. Oral and cutaneous myiases caused by *Chrysomya bezziana*. Surgical Practice. 2010;9:28-30.
- Lam KH, Lui TH. Myiasis of the foot and leg caused by *Chrysomya bezziana*. J Foot Ankle Surg. 2014;53(1):88-91. doi: 10.1053/j.jfas.2013.05.001

107. Kwong A, Yiu WK, Chow LW, Wong S. *Chrysomya bezziana*: a rare infestation of the breast. *Breast J*. 2007;13(3):297-301. doi: 10.1111/j.1524-4741.2007.00426.x
108. Zachariah JE, Sehgal K, Dixit UB, Bhatia R. Oral myiasis: a case report. *Spec Care Dentist*. 2014;34(1):51-53. doi: 10.1111/scd.12016
109. Verma L, Pakrasi S, Kumar A, Sachdev MS, Mandal AK. External ophthalmomyiasis associated with herpes zoster ophthalmicus. *Can J Ophthalmol*. 1990;25(1):42-43.
110. Amandeep S, Devinder S, Rajiv J. *Chrysomya bezziana* (Diptera: Calliphoridae) as a causative agent of myiasis in patients suffering from oral cancer. *Journal of Entomological Research*. 2011;35:187-189.
111. Avula JK, Avula H, Arora N, Manchukonda UK, Vivekavardhan RN. Orofacial myiasis of the gingiva and nasal cavity: a report of two cases and general review. *J Periodontol*. 2011;82(9):1383-1388. doi: 10.1902/jop.2011.100724
112. Rathi S, Pednekar K, Pathak A, Singh P. Screw-worm myiasis of prolapsed rectum. *Indian Pediatr*. 2014;51(1):53-54.
113. Ghosh SK, Bandyopadhyay D, Sarkar S. Myiasis in a large perigenital seborrheic keratosis. *Indian J Dermatol*. 2010;55(3):305-306. doi: 10.4103/0019-5154.70699
114. Maheshwari V, Naidu S. Oral Myiasis caused by *Chrysomya bezziana* A case report. *Peoples Journal of Scientific Research*. 2010;3(2):25-26.
115. Aggarwal A, Daniel MJ, Shetty RS, Kumar BN, Sumalatha CH, Srikanth E, et al. Oral Myiasis Caused by *Chrysomya bezziana* in Anterior Maxilla. *Case Reports in Dentistry*. 2014;2014:1-4. doi: 10.1155/2014/518427
116. Jimson S, Prakash CA, Balachandran C, Raman M. Oral myiasis: case report. *Indian J Dent Res*. 2013;24(6):750-752. doi: 10.4103/0970-9290.127626
117. Sankari LS, Ramakrishnan K. Oral myiasis caused by *Chrysomya bezziana*. *J Oral Maxillofac Pathol*. 2010;14(1):16-18. doi: 10.4103/0973-029X.64304
118. Candamourty R, Venkatachalam S, Yuvaraj V, Sujee C. Oral myiasis in an adult associated with filariasis and Hansen's disease. *J Nat Sci Biol Med*. 2013;4(1):259-262. doi: 10.4103/0976-9668.107322
119. Pandhi D, Singal A, Das S. Myiasis arising in condylomata acuminata: an unusual presentation. *Int J Std Aids*. 2011; 22(4):238–240. <https://doi.org/10.1258/ijsa.2010.010357>
120. Kumar GV, Sowmya G, Shivananda S. *Chrysomya bezziana* oral myiasis. *J Glob Infect Dis*. 2011;3(4):393-395. doi: 10.4103/0974-777X.91066
121. Anand S, Taneja S. Oral myiasis, a case report. *Armed Forces Med J India*. 1971;27:277-278.
122. Singh A, Singh D. Traumatic Myiasis of the Scalp in a 3-year-old Patient- A Case of Neglected Health Care. *Malaysian Journal of Medicine & Health Sciences*. 2019;15(1):89-91.
123. Talari S, Yeganeh-Moghadam A, Dehghani R. *Chrysomya bezziana* infestation. *Arch Iran Med*. 2002;5(1):56-58.
124. Ahmadi MS, Nasirian H, Gheshmi AMN, Ershadi MRY. Human Extensive Head Skin Myiasis. *Iran J Public Health*. 2009;38(1):134-138.
125. Jdalayer T, Maleki M, Monghtaderi M. Human urogenital myiasis caused by *Chrysomyia bezziana*. *Iran J Public Health*. 1978;7:116-117.
126. El-Azazy OM. Old World screw-worm fly (*Chrysomyia bezziana*) in the Gulf. *Vet Rec*. 1993;132(10):256.
127. Alizadeh AM, Zamani N. Myiasis in an 89-year-old man with non-hodgkin lymphoma. *J Arthropod Borne Dis*. 2014;8(1):117-118.
128. Lee HL, Krishnasamy M, Jeffery J. A case of human nasopharyngeal myiasis caused by *Chrysomya bezziana* Villeneuve, 1914 (Diptera: Calliphoridae) in Malaysia. *Trop Biomed*. 2005;22(1):87-88.
129. Ramalingam S, Nurulhuda A, Bee LH. Urogenital myiasis caused by *Chrysomya bezziana* (Diptera: Calliphoridae) in peninsular Malaysia. *The Southeast Asian journal of tropical medicine and public health*. 1980;11(3):405-407.
130. Rohela M, Jamaiah I, Amir L, Nissapatorn V. A case of auricular myiasis in Malaysia. *Southeast Asian J Trop Med Public Health*. 2006;37 Suppl 3:91-94.
131. Bayer HG. Myiasis maligna of nose and ears in Ceylon; recommendation of a new treatment. *AMA Arch Otolaryngol*. 1954;59(1):104-107.
132. Lubis RR, Albar MY, Darlan DM. Massive orbital myiasis arising from nasal myiasis in an Indonesian patient with diabetes. *American journal of ophthalmology case reports*. 2019;13:147-150. doi: 10.1016/j.ajoc.2019.01.006
133. Slesak G, Inthalad S, Strobel M, Marschal M, Hall MJ, Newton PN. Chromoblastomycosis after a leech bite complicated by myiasis: a case report. *Bmc Infect Dis*. 2011;11:14. doi: 10.1186/1471-2334-11-14
134. Zaidi F, Ali N, Khisroon M. Urinogenital Myiasis From Blow Fly in a Pakistani Child. *J Coll Physicians Surg Pak*. 2016;26(6 Suppl):S35-S36.
135. Fain A, Magis P, Verdin G, Donkers J, Gobbels P. [On 2 cases of human myiasis produced by *Chrysomyia bezziana* Villeneuve in the Belgian Congo]. *Ann Soc Belg Med Trop (1920)*. 1959;39:763-765.
136. Ansari M, Oertley R. Nasal myiasis due to Bezzi's blowfly (screw-worm): case report. *Saudi Med J*. 1982;3:275-278.
137. Ausayakhun S, Limsopatham K, Sanit S, Sukontason K, Sukontason KL. Orbital ophthalmomyiasis caused by *Chrysomya bezziana* in Thailand. *Trop Biomed*. 2018;35(1):288-292.
138. Patton W. Note on the occurrence of *Passeromyia heterochaeta* Villeneuve in India. *Ind J Med Res*. 1920;8:30.
139. Patton W. Some notes on Indian Calliphorinae VII. Additional cases of myiasis caused by the larvae of *Chrysomyia bezziana* Vill., together with some notes on the Diptera which cause myiasis in man and animals. *Ind J Med Res*. 1922;9:654.
140. Bouffard G, Legac P. Myiase a *Chrysomyia bezzianum* observe chez un indigene de la Cote d'Ivoire. *Bull Soc Path Exot*. 1929;22:48.
141. Symes C, Roberts J. A list of the Muscidae and Oestridae causing myiasis in man and animals in Kenya recorded at the medical research laboratory, Nairobi. *E Afr Med J*. 1932;9:18.
142. Hopkins G. Notes on myiasis especially in Uganda. *E Afr Med J*. 1944;21:258.
