# Supplementary material for: Human Chrysomya bezziana myiasis: A systematic review
Source: PubMed Central journal article supplement (PMC6821133; doi:10.1371/journal.pntd.0007391), 2019-10-16
Supplement: pntd.0007391.s006.pdf [file pntd.0007391.s006.pdf]

**S2 Table. The patients with *Chrysomya bezziana* myiasis were grouped by age.**

| <b>Age group</b> | <b>Cases number worldwide</b> | <b>Percentage (%)</b> | <b>Cases number in Hong Kong</b> | <b>Percentage (%)</b> |
|------------------|-------------------------------|-----------------------|----------------------------------|-----------------------|
| age ≤ 14         | 21                            | 3.44                  | 0                                | 0                     |
| age 15-64        | 73                            | 27.84                 | 11                               | 12.94                 |
| age ≥ 65         | 96                            | 34.02                 | 57                               | 67.59                 |
| No report        | 101                           | 34.71                 | 17                               | 20.00                 |
| Total            | 291                           | 100                   | 85                               | 100                   |
