# Supplementary material for: Human Chrysomya bezziana myiasis: A systematic review
Source: PubMed Central journal article supplement (PMC6821133; doi:10.1371/journal.pntd.0007391), 2019-10-16
Supplement: pntd.0007391.s007.pdf [file pntd.0007391.s007.pdf]

**S3 Table. Summary of main therapies recorded in human cases with *Chrysomya bezziana* myiasis worldwide.**

| Methods for removal of larvae | Mouth | Limb | Perineal & inguinal regions | Ear | Eye | Nose | Tracheostomy/<br>Pharyngostomy | Face | Scalp | Torso |
|-------------------------------|-------|------|-----------------------------|-----|-----|------|--------------------------------|------|-------|-------|
| Manual removal (n = 127)      | 42    | 46   | 8                           | 3   | 11  | 8    | 5                              | 4    | 4     | 5     |
| Surgical removal (n = 50)     | 18    | 12   | 1                           | 3   | 10  | 2    | 3                              | 1    | 1     | 2     |
| Suffocating agent (n = 43)    | 11    | 13   | 4                           | 2   | 6   | 4    | 2                              | 3    | 2     | 0     |
| Antibiotics (n = 47)          | 19    | 8    | 3                           | 2   | 8   | 5    | 3                              | 2    | 2     | 0     |
