# Supplementary material for: Human Chrysomya bezziana myiasis: A systematic review
Source: PubMed Central journal article supplement (PMC6821133; doi:10.1371/journal.pntd.0007391), 2019-10-16
Supplement: pntd.0007391.s008.pdf [file pntd.0007391.s008.pdf]

**S4 Table. Health outcomes of human cases due to *Chrysomya bezziana*.**

| <b>Worldwide</b>           | <b>Age group</b> |           |           |            | <b>Total</b> |
|----------------------------|------------------|-----------|-----------|------------|--------------|
| <b>Outcome</b>             | age ≤ 14         | age 15-64 | age ≥ 65  | No report  |              |
| Recovery/discharged/stable | 15               | 64        | 67        | 2          | 148          |
| Death                      | 0                | 1         | 22        | 0          | 23           |
| No report                  | 6                | 8         | 7         | 99         | 120          |
| <b>Total</b>               | <b>21</b>        | <b>73</b> | <b>96</b> | <b>101</b> | <b>291</b>   |

| <b>Hong Kong</b>           | <b>Age group</b> |           |           |           | <b>Total</b> |
|----------------------------|------------------|-----------|-----------|-----------|--------------|
| <b>Outcome</b>             | age ≤ 14         | age 15-64 | age ≥ 65  | No report |              |
| Recovery/discharged/stable | 0                | 10        | 36        | 0         | 46           |
| Death                      | 0                | 0         | 20        | 0         | 20           |
| No report                  | 0                | 1         | 1         | 17        | 19           |
| <b>Total</b>               | <b>0</b>         | <b>11</b> | <b>57</b> | <b>17</b> | <b>85</b>    |
