# Supplementary material for: Human Chrysomya bezziana myiasis: A systematic review
Source: PubMed Central journal article supplement (PMC6821133; doi:10.1371/journal.pntd.0007391), 2019-10-16
Supplement: pntd.0007391.s009.pdf [file pntd.0007391.s009.pdf]

**S5 Table. Distribution of *Chrysomya bezziana* recorded in the world**

| Author                                 | Year      | Province/District                                                                                                                     | Countries  | Continent | Note                     |
|----------------------------------------|-----------|---------------------------------------------------------------------------------------------------------------------------------------|------------|-----------|--------------------------|
| Zhong YH <sup>143</sup>                | 1994      | Guangdong/Zhaoqing                                                                                                                    | China      | Asia      | -                        |
| Fan ZD <sup>2</sup>                    | 1997      | South China, Xizang/Motuo                                                                                                             | China      | Asia      | -                        |
| Yao QG, et al <sup>144</sup>           | 1999      | Gansu/Lanzhou                                                                                                                         | China      | Asia      | -                        |
| Xu BH <sup>145</sup>                   | 2001      | Fujian/Shaowu, Fuqing, Quanzhou, Huian, Anxi, Dehua, Jinjiang, Xiamen                                                                 | China      | Asia      | -                        |
| Zhang YQ, et al <sup>146</sup>         | 2001      | Guangxi                                                                                                                               | China      | Asia      | -                        |
| Zhang SH, et al <sup>147</sup>         | 2002      | Guangdong/Shenzhen                                                                                                                    | China      | Asia      | -                        |
| Zhu W, et al <sup>148</sup>            | 2003      | Guangxi                                                                                                                               | China      | Asia      | -                        |
| Li Q <sup>149</sup>                    | 2006      | Yunnan, Xizang, Hunan, Fujian, Taiwan, Guangdong, Guangxi, Hainan                                                                     | China      | Asia      | -                        |
| Shi J, et al <sup>150</sup>            | 2006      | Hebei/Qinhuangdao                                                                                                                     | China      | Asia      | -                        |
| Fei XD <sup>151</sup>                  | 2011      | Hunan, Fujian, Taiwan, Guangdong, Hainan, Guangxi, Yunnan, Xizang                                                                     | China      | Asia      | -                        |
| Deng XR, et al <sup>152</sup>          | 2004,2005 | Fujian/Longyan                                                                                                                        | China      | Asia      | -                        |
| Liang G, et al <sup>153</sup>          | 2010      | Guangdong/Nansha                                                                                                                      | China      | Asia      | -                        |
| Lin F, et al <sup>154</sup>            | 2010      | Fujian/Fuzhou                                                                                                                         | China      | Asia      | -                        |
| Duan HS, et al <sup>155</sup>          | 2010      | Hubei                                                                                                                                 | China      | Asia      | -                        |
| Xue WQ <sup>156</sup>                  | 2006      | Qinghai, Xizang, Fujian, Hainan, Taiwan, Guangxi, Yunnan, Guangdong                                                                   | China      | Asia      | -                        |
| Liu ZJ, et al <sup>157</sup>           | 2011      | Gansu/Lanzhou, Shannxi/Baoji, Meixian, Qishan, Zhouzhi, Huxian, Xi'an, Lantian, Weinan, Huayin, Tongguan, Huaxian, Taibai             | China      | Asia      | -                        |
| Wang Y, et al <sup>158</sup>           | 2012      | Gansu/Lanzhou                                                                                                                         | China      | Asia      | -                        |
| Feng Y <sup>159</sup>                  | 2015      | Sichuan/Ya'an                                                                                                                         | China      | Asia      | -                        |
| Wardhana A, et al <sup>160</sup>       | 2012b     | Hong Kong                                                                                                                             | China      | Asia      | -                        |
| Ng KH, et al <sup>148</sup>            | 2003      | Hong Kong                                                                                                                             | China      | Asia      | -                        |
| Ready PD, et al <sup>161</sup>         | 2009      | Hong Kong                                                                                                                             | China      | Asia      | -                        |
| Norris KR and Murray MD <sup>162</sup> | 1964      | Taiwan                                                                                                                                | China      | Asia      | Present                  |
| Kloft WJ et al <sup>163</sup>          | 1981      | -                                                                                                                                     | Bahrain    | Asia      | Present, few occurrences |
| Hall MJ, et al <sup>164</sup>          | 2001      | -                                                                                                                                     | Bahrain    | Asia      | Present, few occurrences |
| James MT <sup>165</sup>                | 1947      | -                                                                                                                                     | Bangladesh | Asia      | Present                  |
| James MT <sup>165</sup>                | 1947      | -                                                                                                                                     | Cambodia   | Asia      | Present                  |
| Norris KR and Murray MD <sup>162</sup> | 1964      | Andhra Pradesh, Chhattisgarh, Dadra and Nagar Haveli, Karnataka, Kerala, Madhya Pradesh, Maharashtra, Odisha, Tamil Nadu, West Bengal | India      | Asia      | Present                  |
| James MT <sup>165</sup>                | 1947      | -                                                                                                                                     | India      | Asia      | Present                  |
| Wardhana AH, et al <sup>160</sup>      | 2012b     | Irian Jaya, Java, Kalimantan, Nusa, Tenggara, Sulawesi, Sumatra                                                                       | Indonesia  | Asia      | Present                  |

|                                            |       |                                                                 |                      |      |         |
|--------------------------------------------|-------|-----------------------------------------------------------------|----------------------|------|---------|
| Wardhana AH, et al <sup>166</sup>          | 2014  | Irian Jaya, Java, Kalimantan, Nusa, Tenggara, Sulawesi, Sumatra | Indonesia            | Asia | Present |
| Norris KR and Murray MD <sup>162</sup>     | 1964  | Nusa, Tenggara, Sulawesi, Sumatra                               | Indonesia            | Asia | Present |
| Wardhana AH, et al <sup>160</sup>          | 2012b | Boushehr and Hormozoan Provinces                                | Iran                 | Asia | Present |
| Hall MJ, et al <sup>164</sup>              | 2001  | Boushehr and Hormozoan Provinces                                | Iran                 | Asia | Present |
| Hall MJ, et al <sup>167</sup>              | 2009  | Boushehr and Hormozoan Provinces                                | Iran                 | Asia | Present |
| Wardhana AH, et al <sup>160</sup>          | 2012b | Basrah, Karbala and Diayala Provinces                           | Iraq                 | Asia | Present |
| Hall MJ, et al <sup>164</sup>              | 2001  | Basrah, Karbala and Diayala Provinces                           | Iraq                 | Asia | Present |
| Hall MJ, et al <sup>167</sup>              | 2009  | Basrah, Karbala and Diayala Provinces                           | Iraq                 | Asia | Present |
| Rajapaksa N and Spradbery JP <sup>59</sup> | 1989  | -                                                               | Kuwait               | Asia | Present |
| Hall MJ, et al <sup>164</sup>              | 2001  | -                                                               | Kuwait               | Asia | Present |
| James MT <sup>165</sup>                    | 1947  | -                                                               | Laos                 | Asia | Present |
| Wardhana AH, et al <sup>160</sup>          | 2012b | -                                                               | Malaysia             | Asia | Present |
| Norris KR and Murray MD <sup>162</sup>     | 1964  | Peninsular Malaysia                                             | Malaysia             | Asia | Present |
| James MT <sup>165</sup>                    | 1947  | -                                                               | Myanmar              | Asia | Present |
| Norris KR and Murray MD <sup>162</sup>     | 1964  | -                                                               | Myanmar              | Asia | Present |
| Hall MJ, et al <sup>164</sup>              | 2001  | -                                                               | Myanmar              | Asia | Present |
| Wardhana AH, et al <sup>160</sup>          | 2012b | Al-Batina, Al-Shargiah and Interior Districts                   | Oman                 | Asia | Present |
| Spradbery JP, et al <sup>168</sup>         | 1992  | Al-Batina, Al-Shargiah and Interior Districts                   | Oman                 | Asia | Present |
| Hall MJ, et al <sup>167</sup>              | 2009  | Al-Batina, Al-Shargiah and Interior Districts                   | Oman                 | Asia | Present |
| James MT <sup>165</sup>                    | 1947  | -                                                               | Pakistan             | Asia | Present |
| Hall MJ, et al <sup>164</sup>              | 2001  | -                                                               | Pakistan             | Asia | Present |
| James MT <sup>165</sup>                    | 1947  | -                                                               | Philippines          | Asia | Present |
| Rajapaksa N and Spradbery JP <sup>59</sup> | 1989  | -                                                               | Qatar                | Asia | Present |
| Wardhana AH, et al <sup>160</sup>          | 2012b | Al-Khari, Al-Muzahimiyah, Al-Ehsaa                              | Saudi Arabia         | Asia | Present |
| Ansari M and Oertley R <sup>136</sup>      | 1982  | Al-Khari, Al-Muzahimiyah, Al-Ehsaa                              | Saudi Arabia         | Asia | Present |
| Hall MJ, et al <sup>167</sup>              | 2009  | Al-Khari, Al-Muzahimiyah, Al-Ehsaa                              | Saudi Arabia         | Asia | Present |
| James MT <sup>165</sup>                    | 1947  | -                                                               | Sri Lanka            | Asia | Present |
| James MT <sup>165</sup>                    | 1947  | -                                                               | Thailand             | Asia | Present |
| Spradbery JP and Kirk J <sup>40</sup>      | 1992  | -                                                               | United Arab Emirates | Asia | Present |
| Hall MJ, et al <sup>164</sup>              | 2001  | -                                                               | United Arab Emirates | Asia | Present |
| James MT <sup>165</sup>                    | 1947  | -                                                               | Vietnam              | Asia | Present |

|                                            |       |   |                                            |                           |         |                          |
|--------------------------------------------|-------|---|--------------------------------------------|---------------------------|---------|--------------------------|
| Wardhana AH, et al <sup>160</sup>          | 2012b | - |                                            | Yemen                     | Asia    | Localised                |
| Robinson AS, et al <sup>169</sup>          | 2009  | - |                                            | Yemen                     | Asia    | Localised                |
| Hall MJ, et al <sup>164</sup>              | 2001  | - |                                            | Cameroon                  | Africa  | Present                  |
| Hall MJ, et al <sup>164</sup>              | 2001  | - |                                            | Chad                      | Africa  | Present                  |
| James MT <sup>165</sup>                    | 1947  | - |                                            | Congo                     | Africa  | Present                  |
| Rovere J <sup>3</sup>                      | 1910  | - |                                            | Congo Democratic Republic | Africa  | Present                  |
| Hall MJ, et al <sup>170</sup>              | 2014  | - |                                            | Congo Democratic Republic | Africa  | Present                  |
| James MT <sup>165</sup>                    | 1947  | - |                                            | Côte d'Ivoire             | Africa  | Present                  |
| James MT <sup>165</sup>                    | 1947  | - |                                            | Equatorial Guinea         | Africa  | Present                  |
| Hall MJ, et al <sup>164</sup>              | 2001  |   | Two localities: Gondar, Yabello            | Ethiopia                  | Africa  | Present                  |
| Fetene T and Worku N <sup>171</sup>        | 2009  |   | Woreta, northwestern Ethiopa               | Ethiopia                  | Africa  | -                        |
| James MT <sup>165</sup>                    | 1947  | - |                                            | Gambia                    | Africa  | Present                  |
| James MT <sup>165</sup>                    | 1947  | - |                                            | Guinea                    | Africa  | Present                  |
| Norris KR and Murray MD <sup>162</sup>     | 1964  | - |                                            | Guinea-Bissau             | Africa  | Present                  |
| James MT <sup>165</sup>                    | 1947  | - |                                            | Kenya                     | Africa  | Present                  |
| Norris KR and Murray MD <sup>162</sup>     | 1964  | - |                                            | Senegal                   | Africa  | Present                  |
| Wardhana Ah, et al <sup>160</sup>          | 2012b |   | East Cape Province                         | South Africa              | Africa  | Present                  |
| Baker JA, et al <sup>172</sup>             | 1968  |   | East Cape Province                         | South Africa              | Africa  | Present                  |
| Hall MJ, et al <sup>170</sup>              | 2014  |   | East Cape Province                         | South Africa              | Africa  | Present                  |
| Hall MJ, et al <sup>170</sup>              | 2014  | - |                                            | Sudan                     | Africa  | Present                  |
| James MT <sup>165</sup>                    | 1947  | - |                                            | Swaziland                 | Africa  | Present                  |
| Norris KR and Murray MD <sup>162</sup>     | 1964  | - |                                            | Tanzania                  | Africa  | Present                  |
| Hall MJ, et al <sup>170</sup>              | 2014  | - |                                            | Tanzania                  | Africa  | Present                  |
| James MT <sup>165</sup>                    | 1947  |   | Zanzibar                                   | Tanzania                  | Africa  | Present                  |
| James MT <sup>165</sup>                    | 1947  | - |                                            | Uganda                    | Africa  | Present                  |
| James MT <sup>165</sup>                    | 1947  | - |                                            | Zambia                    | Africa  | Present                  |
| Wardhana AH, et al <sup>160</sup>          | 2012b | - |                                            | Zimbabwe                  | Africa  | Present                  |
| Cuthbertson A <sup>173</sup>               | 1933  | - |                                            | Zimbabwe                  | Africa  | Present                  |
| Hall MJ, et al <sup>164</sup>              | 2001  | - |                                            | Zimbabwe                  | Africa  | Present                  |
| Rajapaksa N and Spradbery JP <sup>59</sup> | 1988  |   | Australian Northern Territory, Port Darwin | Australia                 | Oceania | Absent, intercepted only |
| Norris KR and Murray MD <sup>162</sup>     | 1964  | - |                                            | Papua New Guinea          | Oceania | Present                  |

|                                          |      |   |                  |         |         |
|------------------------------------------|------|---|------------------|---------|---------|
| Hall MJ et al <sup>164</sup>             | 2001 | - | Papua New Guinea | Oceania | Present |
| Spradbery JP and Tozer RS <sup>174</sup> | 2013 | - | Papua New Guinea | Oceania | Present |

## Reference

143. Zhong Y. The investigation of flies in Zhaoqing City. *Journal of Medical Pest Control*. 1994;10:1-4.
144. Yao Q, Ma Z, Zhou K, Chen G, Li G. Investigation on fly population distribution and seasonal changing at Lanzhou Zhongchuan Air Port. *Port Health Control*. 1999;4:26-29.
145. Xu B. The investigation on the medical insects in Fujian Province III (Diptera: Scarthophagidae, Anthomyiidae, Fannidae, Calliphoridae, Sarcophagidae). *Journal of Medical Pest Control*. 2001;17:295-302.
146. Zhang Y, Huang W. Corrections and additions to a list of parasites for livestock and poultry in Guangxi Zhuang Autonomous Region. *Guangxi Nongye Shengwu Kexue*. 2001;20:223-230.
147. Zhang S, Liang Z, Liang G, Jia F, Chen Z, Zhang X, et al. Contribution to the flies of Shenzhen. *Journal of Medical Pest Control*. 2002;18:347-349.
148. Zhu W, Zhao Y, Bian D, Xue W. Study of calypratae from Guangxi region, China (diptera). *Journal of Shenyang Normal University (Natural Science)*. 2003;21:52-55.
149. Li Q. Comparative study on arthropod communities of different ecosystems in Yuanmou Arid-hot Valley, Yunnan. Ph.D. Thesis, Beijing Forestry University. 2006.
150. Shi J, Zhao Y, Wang S, Zhang G, Chang M, Liu J, et al. Studies on the family Calliphoridae in Hebei Province (Diptera: Cyclorrhapha). *J Med Pest Contrl*. 2006; 22:832-835.
151. Fei X. A review of Calliphoridae from China and apply to Forensic Entomology. M.Sc. Thesis, Shenyang Normal University. 2011.
152. Deng X, Wei W, Wu S, He C. Investigation on fly density in urban area in Longyan from 2004 to 2005. *Preventive Medicine Tribune*. 2007;13:987-989.
153. Liang G, Jia F, Yan Q, Ye T. Calypratae flies of Nansha Port (Diptera: Calypratae). *Journal of Environmental Entomology*. 2010;32:295-299.
154. Lin F, Zhang S, Xu B. Investigation on fly population distribution at Fuzhou Changle International Airport. *Strait Journal of Preventive Medicine*. 2010;16: 28-30.
155. Duan H, Yang Z, Xu G, Zhou S, Wen X, Yu C, et al. Study on delimitation of zoogeographical regions in Hubei. *Chinese Journal of Hygienic Insecticides & Equipments*. 2010;16: 450-454.
156. Xue W. Flies in the Qinghai-Tibetan Plateau (Insect: Diptera). Beijing: Science Press; 2006:211.
157. Liu Z. List of vector species in northwest China. Beijing: Military Medical Science Press; 2011:77.
158. Wang Y, Li G, Huo Z. Species and geographical distribution of flies in Lanzhou City. *Chin J Hyg Insect & Equip*. 2012;18:232-234.
159. Feng Y. Species record and narration of Calliphoridae in Sichuan Province, China (Calliphoridae: Diptera). *Chin J Vector Biol & Control*. 2015;26: 398-403.
160. Wardhana A, Muharsini S, Ready PD, Cameron M, Hall M. Geographical characteristics of *Chrysomya bezziana* based on external morphology study. *JITV*. 2012;17(1):36-48.
161. Ready PD, Testa JM, Wardhana AH, Al-Izzi M, Khalaj M, Hall MJ. Phylogeography and recent emergence of the Old World screwworm fly, *Chrysomya bezziana*, based on mitochondrial and nuclear gene sequences. *Med Vet Entomol*. 2009;23(S1):43-50. doi: 10.1111/j.1365-2915.2008.00771.x.
162. Norris KR, Murray MD. Notes on the screw-worm fly *Chrysomya bezziana* (Diptera: Calliphoridae) as a pest of cattle in Papua New Guinea. CSIRO Division of Entomology Technical Paper. Melbourne, Australia. 1964;6:26.
163. Kloft WJ, Noll GF, Kloft ES. Introduction of *Chrysomya bezziana* Villeneuve (Dipt., Calliphoridae) into new geographical regions by "transit infestation". (Durch "Transitbefall" bewirkte Einschleppung von *Chrysomya bezziana* Villeneuve (Dipt., Calliphoridae) in neue geographische Regionen.) *Mitteilungen der Deutschen Gesellschaft für Allgemeine und Angewandte Entomologie*. 1981;3(1/3):151-154.
164. Hall MJ, Edge W, Testa JM, Adams ZJ, Ready PD. Old World screwworm fly, *Chrysomya bezziana*, occurs as two geographical races. *Med Vet Entomol*. 2001;15(4): 393-402.
165. James MT. The Flies that cause Myiasis in Man. Washington, D.C.:U.S. Dept. of Agriculture; 1947:175.
166. Wardhana AH, Cecchi G, Muharsini S, Cameron MM, Ready PD, Hall MJ. Environmental and phylogeographical determinants of the distribution of the Old World screwworm fly in Indonesia. *Acta Tropica*. 2014; 138(Suppl):S62-S68. doi: 10.1016/j.actatropica.2014.06.001.
167. Hall MJ, Wardhana AH, Shahhosseini G, Adams ZJ, Ready PD. Genetic diversity of populations of Old World screwworm fly, *Chrysomya bezziana*, causing traumatic myiasis of livestock in the Gulf region and implications for control by sterile insect technique. *Med Vet Entomol*. 2009;23(Suppl):51-58. doi:

10.1111/j.1365-2915.2008.00778.x.

168. Spradbery JP. Studies on the prepupal and puparial stages of the Old World screw-worm fly, *Chrysomya bezziana* Villeneuve (Diptera: Calliphoridae). CSIRO Division of Entomology Technical Report. 1992;49:24 .
169. Robinson AS, Vreysen MJ, Hendrichs J, Feldmann U. Enabling technologies to improve area-wide integrated pest management programmes for the control of screwworms. *Med Vet Entomol.* 2009;23(Suppl):1-7. doi: 10.1111/j.1365-2915.2008.00769.x.
170. Hall MJ, MacLeod N, Wardhana AH. Use of wing morphometrics to identify populations of the Old World screwworm fly, *Chrysomya bezziana* (Diptera: Calliphoridae): a preliminary study of the utility of museum specimens. *Acta Tropica.* 2014;138(Suppl):S49-S55. doi: 10.1016/j.actatropica.2014.03.023.
171. Fetene T, Worku N. Public health importance of non-biting cyclorrhaphan flies. *Trans R Soc Trop.* 2009;103(2):187-191. doi: 10.1016/j.trstmh.2008.08.010.
172. Baker JA, Mchardy WM, Thorburn JA, Thompson GE. *Chrysomya bezziana* Villeneuve-some observations on its occurrence and activity in the Eastern Cape Province. South African Veterinary Medical Association. 1968;39:3-11.
173. Cuthbertson A. The Habits and Life Histories of some Diptera in Southern Rhodesia. Proceedings and Transactions of the Rhodesia Scientific Association. 1933;32:81-111.
174. Spradbery P, Tozer RS. Trapping Old World screw-worm fly, *Chrysomya bezziana* Villeneuve (Diptera: Calliphoridae), in Papua New Guinea including the coastal border with Torres Strait. *Australian Journal of Entomology.* 2013;52(2):164-167. doi: 10.1111/aen.12007.
