# Supplementary material for: Human Chrysomya bezziana myiasis: A systematic review
Source: PubMed Central journal article supplement (PMC6821133; doi:10.1371/journal.pntd.0007391), 2019-10-16
Supplement: pntd.0007391.s010.pdf [file pntd.0007391.s010.pdf]

**S6 Table. A gender analysis in patients with *Chrysomya bezziana* myiasis**

| <b>Worldwide</b> | <b>age ≤ 14</b> | <b>age 15-64</b> | <b>age ≥ 65</b> | <b>No report</b> | <b>Total</b> | <b>Percentage (%)</b> |
|------------------|-----------------|------------------|-----------------|------------------|--------------|-----------------------|
| Female           | 7               | 35               | 51              | 3                | 96           | 32.99                 |
| Male             | 13              | 38               | 44              | 2                | 97           | 33.33                 |
| No report        | 1               | 0                | 1               | 96               | 98           | 33.68                 |
| <b>Total</b>     | <b>21</b>       | <b>73</b>        | <b>96</b>       | <b>101</b>       | <b>291</b>   | <b>100.00</b>         |

| <b>Hong Kong</b> | <b>age ≤ 14</b> | <b>age 15-64</b> | <b>age ≥ 65</b> | <b>No report</b> | <b>Total</b> | <b>Percentage (%)</b> |
|------------------|-----------------|------------------|-----------------|------------------|--------------|-----------------------|
| Female           | 0               | 5                | 31              | 0                | 36           | 42.35                 |
| Male             | 0               | 6                | 26              | 0                | 32           | 37.65                 |
| No report        | 0               | 0                | 0               | 17               | 17           | 20.00                 |
| <b>Total</b>     | <b>0</b>        | <b>11</b>        | <b>57</b>       | <b>17</b>        | <b>85</b>    | <b>100.00</b>         |
