# Supplementary material for: Human Chrysomya bezziana myiasis: A systematic review
Source: PubMed Central journal article supplement (PMC6821133; doi:10.1371/journal.pntd.0007391), 2019-10-16
Supplement: pntd.0007391.s011.pdf [file pntd.0007391.s011.pdf]

**S7 Table. Analysis of the socioeconomic status of patients with *Chrysomya bezziana* myiasis**

| <b>Low socioeconomic status</b> | <b>Cases number worldwide</b> | <b>Percentage (%)</b> | <b>Cases number in Hong Kong</b> | <b>Percentage (%)</b> |
|---------------------------------|-------------------------------|-----------------------|----------------------------------|-----------------------|
| Yes                             | 154                           | 52.92                 | 52                               | 61.18                 |
| No                              | 11                            | 3.78                  | 5                                | 5.89                  |
| No report                       | 126                           | 43.30                 | 28                               | 32.94                 |
| Total                           | 291                           | 100.00                | 85                               | 100.00                |
