# Supplementary material for: Human Chrysomya bezziana myiasis: A systematic review
Source: PubMed Central journal article supplement (PMC6821133; doi:10.1371/journal.pntd.0007391), 2019-10-16
Supplement: pntd.0007391.s012.pdf [file pntd.0007391.s012.pdf]

## Appendix S1. Animal cases or outbreaks due to *Chrysomya bezziana* myiasis.

### Animal myiasis worldwide

Since 1909 [3], animal cases and outbreaks due to *C. bezziana* have been recorded in 24 countries worldwide, 16 of them from Asia, including China, Saudi Arabia, Iran, India, Iraq, Oman, Yemen, Pakistan, Kuwait, Singapore, Sri Lanka, Myanmar, Indonesia, United Arab Emirates (UAE), Bahrain and Malaysia (S8 Table; Fig 6A), 7 from Africa, including Zimbabwe, Cameroon, Chad, Kenya, South Africa, Ethiopia, and Democratic Republic of Congo (DRC) [1], and the last from PNG, Oceania, which was sourced from investigations by Spradbery et al (2019) [175]. At least 19 species of domestic and wild animals have been reported to be affected by *C. bezziana* including cattle, sheep, goats, dogs, cats, horses, camels, buffaloes, donkeys, pigs, Sambar and Rusa deer, water buffalo, birds, wallabies, cus cus, rabbits, tree kangaroos, elephants, and chickens (S8 Table). Exotic animals in zoos in *C. bezziana*-endemic areas are also susceptible such as honey and polar bears, gnu, hyaena, lion, puma, rhinocerus and tapir at a zoo in Malaysia [176]. These animals, especially the domesticated species, may represent a high risk in transmitting the disease to humans.

In China, outbreaks of the disease among animals have been recorded in 8 provinces/province-level regions including Hainan, Fujian, Guangxi, Yunnan, Guizhou, and Gansu, as well as Hong Kong and Taiwan (Fig 6B; S8 Table). From 1987 to 1991, 513 animal cases occurred in Guizhou. In Fujian, there were 20 and 85 cattle cases, and 3 pig cases reported in 2001, 2007 and 2011, respectively. Meanwhile, in current decade animal myiasis outbreaks due to *C. bezziana* have been reported in Indonesia in 2006-2009, 2009-2012 and 2014, Yemen in 2008-2009, Pakistan in 2012-2015, Iraq in 2013-2014, Sri Lanka in 2014, India in 2014 and 2018, Saudi Arabia in 2015-2016, Malaysia and Singapore in 2017 (S8 Table).

**S8 Table. Characteristics of animal cases or outbreaks due to *Chrysomya bezziana* myiasis recorded worldwide**

| Author                      | Year             | Country | Province/District | Study design       | Animal        | Number animals | Note |
|-----------------------------|------------------|---------|-------------------|--------------------|---------------|----------------|------|
| Yan R, et al <sup>177</sup> | 1952, 1964, 1981 | China   | Fujian            | Record             | Goat          | -              | -    |
| Yan R, et al <sup>177</sup> | 1952, 1964, 1981 | China   | Fujian            | Record             | Cattle        | -              | -    |
| Yan R, et al <sup>177</sup> | 1952, 1964, 1981 | China   | Fujian            | Record             | Pig           | -              | -    |
| Yan R, et al <sup>177</sup> | 1983             | China   | Fujian            | Animal experiments | Rabbit        | -              | -    |
| Yan R, et al <sup>177</sup> | 1983             | China   | Fujian            | Animal experiments | Guinea pig    | -              | -    |
| Zhang H <sup>178</sup>      | 2007             | China   | Fujian            | Case-series        | Cattle        | 85             | -    |
| Lan Y, et al <sup>179</sup> | 2001             | China   | Fujian            | Case-series        | Cattle        | 20             | -    |
| Lan Y, et al <sup>179</sup> | 2001             | China   | Fujian            | Case-series        | Water buffalo | 1              | -    |
| Liao W <sup>180</sup>       | 2011             | China   | Fujian            | Case-series        | Pigs          | 3              | -    |

|                                                                                      |                            |              |                  |                     |                         |     |   |
|--------------------------------------------------------------------------------------|----------------------------|--------------|------------------|---------------------|-------------------------|-----|---|
| Wang X, et al <sup>181</sup>                                                         | 1987-1991                  | China        | Guizhou          | Case-series         | Cattle, goats and sheep | 513 | - |
| Wang X, et al <sup>181</sup>                                                         | 1988                       | China        | Guizhou          | Record              | Goat                    | -   | - |
| Wei C <sup>182</sup>                                                                 | 1992                       | China        | Guizhou          | Record              | Goat                    | -   | - |
| Wei C <sup>182</sup>                                                                 | 1992                       | China        | Guizhou          | Record              | Cattle                  | -   | - |
| Ye Y <sup>14</sup>                                                                   | 1963                       | China        | Guangxi          | Case report         | Cattle                  | -   | - |
| Ye Y <sup>14</sup>                                                                   | 1965                       | China        | Guangxi          | Case report         | Cattle                  | -   | - |
| Department of Veterinary<br>Medicine, Guangxi<br>Agricultural College <sup>183</sup> | 1978                       | China        | Guangxi          | Field investigation | Cattle                  | -   | - |
| Gan Y <sup>184</sup>                                                                 | Before 1980                | China        | Hainan           | Record              | Cattle                  | -   | - |
| Gan Y <sup>184</sup>                                                                 | Before 1980                | China        | Hainan           | Record              | Pig                     | -   | - |
| Gan Y <sup>184</sup>                                                                 | Before 1980                | China        | Taiwan           | Record              | Sheep                   | -   | - |
| Fan Z <sup>2</sup>                                                                   | 1927,1943, and before 1997 | China        | Taiwan           | Record              | Cattle                  | -   | - |
| Fan Z <sup>2</sup>                                                                   | 1927,1943, and before 1997 | China        | Taiwan           | Record              | Water buffalo           | -   | - |
| Fan Z <sup>2</sup>                                                                   | 1927,1943, and before 1997 | China        | Taiwan           | Record              | Pig                     | -   | - |
| Fan Z <sup>2</sup>                                                                   | Before 1997                | China        | Yunnan           | Record              | Pig                     | -   | - |
| Fan Z <sup>2</sup>                                                                   | Before 1997                | China        | Gansu            | Record              | Goat                    | -   | - |
| Fan Z <sup>2</sup>                                                                   | Before 1997                | China        | Gansu            | Record              | Pig                     | -   | - |
| Chemonges-Nielsen S <sup>185</sup>                                                   | 2003                       | China        | Hong Kong        | Case-series         | Pet dogs                | 12  | - |
| McNae J <sup>186</sup>                                                               | 2001                       | China        | Hong Kong        | Cross-sectional     | Dogs                    | 59  | - |
| Ready PD, et al <sup>161</sup>                                                       | 2009                       | China        | Hong Kong        | Record              | -                       | -   | - |
| Alahmed AM <sup>187</sup>                                                            | 2004                       | Saudi Arabia | Riyadh           | Cross-sectional     | Sheep                   | -   | - |
| Abo-Shehada MN <sup>188</sup>                                                        | 1999-2000                  | Saudi Arabia | Eastern Province | Cross-sectional     | Sheep                   | 151 | - |
| Abo-Shehada MN <sup>188</sup>                                                        | 1999-2000                  | Saudi Arabia | Eastern Province | Cross-sectional     | Goats                   | 154 | - |
| Abo-Shehada MN <sup>188</sup>                                                        | 1999-2000                  | Saudi Arabia | Eastern Province | Cross-sectional     | Cattle                  | 57  | - |

|                                |           |              |                  |                 |         |     |   |
|--------------------------------|-----------|--------------|------------------|-----------------|---------|-----|---|
| Abo-Shehada MN <sup>188</sup>  | 1999-2000 | Saudi Arabia | Eastern Province | Cross-sectional | Camels  | 12  | - |
| Abo-Shehada MN <sup>188</sup>  | 1999-2000 | Saudi Arabia | Eastern Province | Cross-sectional | Horses  | 16  | - |
| Abo-Shehada MN <sup>188</sup>  | 1999-2000 | Saudi Arabia | Eastern Province | Cross-sectional | Donkeys | 1   | - |
| Abo-Shehada MN <sup>188</sup>  | 1999-2000 | Saudi Arabia | Riyadh           | Cross-sectional | Sheep   | 11  | - |
| Abo-Shehada MN <sup>188</sup>  | 1999-2000 | Saudi Arabia | Riyadh           | Cross-sectional | Goats   | 0   | - |
| Abo-Shehada MN <sup>188</sup>  | 1999-2000 | Saudi Arabia | Riyadh           | Cross-sectional | Cattle  | 4   | - |
| Abo-Shehada MN <sup>188</sup>  | 1999-2000 | Saudi Arabia | Riyadh           | Cross-sectional | Camels  | 0   | - |
| Abo-Shehada MN <sup>188</sup>  | 1999-2000 | Saudi Arabia | Riyadh           | Cross-sectional | Horses  | 0   | - |
| Abo-Shehada MN <sup>188</sup>  | 1999-2000 | Saudi Arabia | Riyadh           | Cross-sectional | Donkeys | 0   | - |
| Abo-Shehada MN <sup>188</sup>  | 1999-2000 | Saudi Arabia | Qasseim          | Cross-sectional | Sheep   | 22  | - |
| Abo-Shehada MN <sup>188</sup>  | 1999-2000 | Saudi Arabia | Qasseim          | Cross-sectional | Goats   | 10  | - |
| Abo-Shehada MN <sup>188</sup>  | 1999-2000 | Saudi Arabia | Qasseim          | Cross-sectional | Cattle  | 2   | - |
| Abo-Shehada MN <sup>188</sup>  | 1999-2000 | Saudi Arabia | Qasseim          | Cross-sectional | Camels  | 0   | - |
| Abo-Shehada MN <sup>188</sup>  | 1999-2000 | Saudi Arabia | Qasseim          | Cross-sectional | Horses  | 0   | - |
| Abo-Shehada MN <sup>188</sup>  | 1999-2000 | Saudi Arabia | Qasseim          | Cross-sectional | Donkeys | 0   | - |
| Hall MJ, et al <sup>167</sup>  | 2003-2006 | Saudi Arabia | -                | Cross-sectional | Sheep   | 16  | - |
| Hall MJ, et al <sup>167</sup>  | 2003-2006 | Saudi Arabia | -                | Cross-sectional | Goats   | 10  | - |
| Hall MJ, et al <sup>167</sup>  | 2003-2006 | Saudi Arabia | -                | Cross-sectional | Cattle  | 2   | - |
| Hall MJ, et al <sup>167</sup>  | 2003-2006 | Saudi Arabia | -                | Cross-sectional | Buffalo | 0   | - |
| Hall MJ, et al <sup>167</sup>  | 2003-2006 | Saudi Arabia | -                | Cross-sectional | Horse   | 0   | - |
| Hall MJ, et al <sup>167</sup>  | 2003-2006 | Saudi Arabia | -                | Cross-sectional | Camel   | 1   | - |
| Hall MJ, et al <sup>167</sup>  | 2003-2006 | Saudi Arabia | -                | Cross-sectional | Dog     | 0   | - |
| Salama O, et al <sup>189</sup> | 2015-2016 | Saudi Arabia | Qussim region    | Cross-sectional | Sheep   | 129 | - |
| Salama O, et al <sup>189</sup> | 2015-2016 | Saudi Arabia | Qussim region    | Cross-sectional | Goats   | 18  | - |

|                                       |                                |           |                        |                 |          |     |   |
|---------------------------------------|--------------------------------|-----------|------------------------|-----------------|----------|-----|---|
| Ready PD, et al <sup>161</sup>        | 2009                           | Iran      | -                      | Record          | -        | -   | - |
| Hall MJ, et al <sup>167</sup>         | 2003-2006                      | Iran      | -                      | Cross-sectional | Sheep    | 18  | - |
| Hall MJ, et al <sup>167</sup>         | 2003-2006                      | Iran      | -                      | Cross-sectional | Goats    | 20  | - |
| Hall MJ, et al <sup>167</sup>         | 2003-2006                      | Iran      | -                      | Cross-sectional | Cattle   | 4   | - |
| Hall MJ, et al <sup>167</sup>         | 2003-2006                      | Iran      | -                      | Cross-sectional | Buffalo  | 0   | - |
| Hall MJ, et al <sup>167</sup>         | 2003-2006                      | Iran      | -                      | Cross-sectional | Horse    | 0   | - |
| Hall MJ, et al <sup>167</sup>         | 2003-2006                      | Iran      | -                      | Cross-sectional | Camel    | 0   | - |
| Hall MJ, et al <sup>167</sup>         | 2003-2006                      | Iran      | -                      | Cross-sectional | Dog      | 0   | - |
| Navidpour S, et al <sup>190</sup>     | 1995                           | Iran      | Khoozestan             | Cross-sectional | Sheep    | 408 | - |
| Navidpour S, et al <sup>190</sup>     | 1995                           | Iran      | Khoozestan             | Cross-sectional | Dogs     | 8   | - |
| Soundararajan C, et al <sup>191</sup> | 2018                           | India     | Tamil Nadu state       | Case report     | Elephant | -   | - |
| Bora S, et al <sup>192</sup>          | 2018                           | India     | Assam                  | Cross-sectional | Broilers | 180 | - |
| Ready PD, et al <sup>161</sup>        | 2009                           | Iraq      | -                      | Record          | -        | -   | - |
| Hall MJ, et al <sup>167</sup>         | 2003-2006                      | Iraq      | -                      | Cross-sectional | Sheep    | 24  | - |
| Hall MJ, et al <sup>167</sup>         | 2003-2006                      | Iraq      | -                      | Cross-sectional | Goats    | 4   | - |
| Hall MJ, et al <sup>167</sup>         | 2003-2006                      | Iraq      | -                      | Cross-sectional | Cattle   | 11  | - |
| Hall MJ, et al <sup>167</sup>         | 2003-2006                      | Iraq      | -                      | Cross-sectional | Buffalo  | 1   | - |
| Hall MJ, et al <sup>167</sup>         | 2003-2006                      | Iraq      | -                      | Cross-sectional | Horse    | 1   | - |
| Hall MJ, et al <sup>167</sup>         | 2003-2006                      | Iraq      | -                      | Cross-sectional | Camel    | 0   | - |
| Hall MJ, et al <sup>167</sup>         | 2003-2006                      | Iraq      | -                      | Cross-sectional | Dogs     | 4   | - |
| Sigit SH, et al <sup>193</sup>        | first recognised in 1938, 1981 | Indonesia | widespread in Sulawesi | -               | -        | -   | - |
| Sigit SH, et al <sup>193</sup>        | first recognised in 1938, 1981 | Indonesia | widespread in Java     | -               | -        | -   | - |
| Sigit SH, et al <sup>193</sup>        | first recognised in 1938, 1981 | Indonesia | widespread in Sumba    | -               | -        | -   | - |
| Sigit SH, et al <sup>194</sup>        | 1978                           | Indonesia | -                      | -               | -        | -   | - |

|                                   |           |           |               |                                              |           |     |                                                                                                                                                                   |
|-----------------------------------|-----------|-----------|---------------|----------------------------------------------|-----------|-----|-------------------------------------------------------------------------------------------------------------------------------------------------------------------|
| Basset CR, et al <sup>195</sup>   | 1982      | Indonesia | -             | -                                            | Cattle    | -   | Despite intensive husbandry, losses of calves were frequent and on one property of 5,200 cattle, nearly 3,000 screw-worm cases were recorded during a single year |
| Wardhana AH, et al <sup>196</sup> | 2006-2009 | Indonesia | Kediri        | Cross-sectional                              | Cattle    | -   | -                                                                                                                                                                 |
| Wardhana AH, et al <sup>196</sup> | 2006-2009 | Indonesia | Kediri        | Cross-sectional                              | Goat      | -   | -                                                                                                                                                                 |
| Wardhana AH, et al <sup>196</sup> | 2006-2009 | Indonesia | Nationwide    | Survey                                       | Cattle    | 167 | -                                                                                                                                                                 |
| Wardhana AH, et al <sup>196</sup> | 2006-2009 | Indonesia | Nationwide    | Survey                                       | Sheep     | 15  | -                                                                                                                                                                 |
| Wardhana AH, et al <sup>196</sup> | 2006-2009 | Indonesia | Nationwide    | Survey                                       | Goats     | 57  | -                                                                                                                                                                 |
| Wardhana AH, et al <sup>196</sup> | 2006-2009 | Indonesia | Nationwide    | Survey                                       | Buffalo   | 1   | -                                                                                                                                                                 |
| Wardhana AH, et al <sup>196</sup> | 2006-2009 | Indonesia | Nationwide    | Survey                                       | Horses    | 5   | -                                                                                                                                                                 |
| Wardhana AH, et al <sup>196</sup> | 2006-2009 | Indonesia | Nationwide    | Survey                                       | Dogs      | 7   | -                                                                                                                                                                 |
| Wardhana AH, et al <sup>196</sup> | 2006-2009 | Indonesia | Nationwide    | Survey                                       | Pig       | 1   | -                                                                                                                                                                 |
| Wardhana AH, et al <sup>196</sup> | 2006-2009 | Indonesia | Nationwide    | Survey                                       | NR        | 2   | -                                                                                                                                                                 |
| Wardhana AH, et al <sup>166</sup> | 2014      | Indonesia | -             | Review from the literature and other sources | Livestock | -   | -                                                                                                                                                                 |
| Ready PD, et al <sup>161</sup>    | 2009-2012 | Indonesia | Java, Sumatra | -                                            | Goat      | -   | -                                                                                                                                                                 |
| Ready PD, et al <sup>161</sup>    | 2009-2012 | Indonesia | Java, Sumatra | -                                            | Cow       | -   | -                                                                                                                                                                 |
| Ready PD, et al <sup>161</sup>    | 2009-2012 | Indonesia | Java, Sumatra | -                                            | Calf      | -   | -                                                                                                                                                                 |
| Hall MJ, et al <sup>167</sup>     | 2003-2006 | Oman      | -             | Cross-sectional                              | Sheep     | 5   | -                                                                                                                                                                 |
| Hall MJ, et al <sup>167</sup>     | 2003-2006 | Oman      | -             | Cross-sectional                              | Goats     | 35  | -                                                                                                                                                                 |
| Hall MJ, et al <sup>167</sup>     | 2003-2006 | Oman      | -             | Cross-sectional                              | Cattle    | 0   | -                                                                                                                                                                 |
| Hall MJ, et al <sup>167</sup>     | 2003-2006 | Oman      | -             | Cross-sectional                              | Buffalo   | 0   | -                                                                                                                                                                 |
| Hall MJ, et al <sup>167</sup>     | 2003-2006 | Oman      | -             | Cross-sectional                              | Horse     | 0   | -                                                                                                                                                                 |
| Hall MJ, et al <sup>167</sup>     | 2003-2006 | Oman      | -             | Cross-sectional                              | Camel     | 0   | -                                                                                                                                                                 |
| Hall MJ, et al <sup>167</sup>     | 2003-2006 | Oman      | -             | Cross-sectional                              | Dog       | 0   | -                                                                                                                                                                 |

|                                    |            |                  |   |                 |                 |            |   |
|------------------------------------|------------|------------------|---|-----------------|-----------------|------------|---|
| Spradbery JP, et al <sup>197</sup> | 1992       | Oman             | - | -               | Goats and sheep | 53(93%,57) | - |
| Ready PD, et al <sup>161</sup>     | 2009       | Papua New Guinea |   | Record          | -               | -          | - |
| Spradbery JP*                      | 1970       | Papua New Guinea | - | -               | Cattle          | -          | - |
| Spradbery JP*                      | 1975-1982  | Papua New Guinea | - | -               | Sheep           | 751        | - |
| Spradbery JP*                      | 1967-1981  | Papua New Guinea | - | -               | Rusa Deer       | 7          | - |
| Spradbery JP*                      | 1970-1978  | Papua New Guinea | - | -               | Pigs            | 7          | - |
| Spradbery JP*                      | 1973-1977  | Papua New Guinea | - | -               | Horses          | 3          | - |
| Spradbery JP*                      | 1964       | Papua New Guinea | - | -               | Donkeys         | 1          | - |
| Spradbery JP*                      | 1975, 1980 | Papua New Guinea | - | -               | Goats           | 2          | - |
| Spradbery JP*                      | 1972-1980  | Papua New Guinea | - | -               | Dogs            | 6          | - |
| Spradbery JP*                      | 1976       | Papua New Guinea | - | -               | Cat             | 1          | - |
| Spradbery JP*                      | 1976       | Papua New Guinea | - | -               | Birds           | 2          | - |
| Spradbery JP*                      | 1977       | Papua New Guinea | - | -               | Wallaby         | 1          | - |
| Spradbery JP*                      | 1973, 1979 | Papua New Guinea | - | -               | Cus Cus         | 2          | - |
| Norris K, et al <sup>162</sup>     | 1964       | Papua New Guinea |   | -               | Cattle?         | 53(95%,56) | - |
| Spradbery JP*                      | 2008       | Yemen            | - | Record          | Cattle          | -          | - |
| Spradbery JP*                      | 2008       | Yemen            | - | Record          | Sheep           | -          | - |
| Spradbery JP*                      | 2008       | Yemen            | - | Record          | Goats           | -          | - |
| Spradbery JP*                      | 2008       | Yemen            | - | Record          | Camels          | -          | - |
| Spradbery JP*                      | 2008       | Yemen            | - | Record          | Deer or gazelle | -          | - |
| Spradbery JP*                      | 2009       | Yemen            | - | Record          | Cattle          | -          | - |
| Spradbery JP*                      | 2009       | Yemen            | - | Record          | Sheep           | -          | - |
| Spradbery JP*                      | 2009       | Yemen            | - | Record          | Goats           | -          | - |
| Spradbery JP*                      | 2008       | Yemen            | - | Outbreak report | Oats            | -          | - |

|                                       |            |                      |            |                 |                           |            |                                                                                                                        |
|---------------------------------------|------------|----------------------|------------|-----------------|---------------------------|------------|------------------------------------------------------------------------------------------------------------------------|
| Spradbery JP*                         | 2008       | Yemen                | -          | Outbreak report | Sheep                     | -          | -                                                                                                                      |
| Spradbery JP*                         | 2008       | Yemen                | -          | Outbreak report | Cattle                    | -          | -                                                                                                                      |
| Spradbery JP*                         | 2008       | Yemen                | -          | Outbreak report | Camels                    | -          | -                                                                                                                      |
| Spradbery JP*                         | 2008       | Yemen                | -          | Outbreak report | Donkeys                   | -          | -                                                                                                                      |
| Spradbery JP*                         | 2008       | Yemen                | Mahwit     | Outbreak report | Cattle                    | 180        | -                                                                                                                      |
| Spradbery JP*                         | 2008       | Yemen                | Mahwit     | Outbreak report | Sheep                     | 848        | -                                                                                                                      |
| Spradbery JP*                         | 2008       | Yemen                | Mahwit     | Outbreak report | Goats                     | 998        | -                                                                                                                      |
| Spradbery JP*                         | 2008       | Yemen                | Mahwit     | Outbreak report | Camels                    | 351        | -                                                                                                                      |
| Spradbery JP*                         | 2008       | Yemen                | Mahwit     | Outbreak report | Donkeys                   | 295        | -                                                                                                                      |
| Spradbery JP*                         | 2008       | Yemen                | -          | Record          | -                         | 1500       | -                                                                                                                      |
| Spradbery JP, et al <sup>40</sup>     | 1992       | Kuwait               | -          | -               | -                         | -          | -                                                                                                                      |
| Ready PD, et al <sup>161</sup>        | 2009       | Kuwait               | -          | Record          | -                         | -          | -                                                                                                                      |
| Soundararajan C, et al <sup>198</sup> | 2007       | India                | Tamil Nadu | Cross-sectional | Sheep                     | 127        | -                                                                                                                      |
| Katoch R, et al <sup>199</sup>        | 2014       | India                | Jammu      | Case report     | Buffalo                   | 1          | -                                                                                                                      |
| Kumar R, et al <sup>200</sup>         | 1984       | India                | -          | -               | Cattle                    | -          | Food rot and foot and mouth disease(FMD) lead to a significant increase in the incidence of <i>C. bezziana myiasis</i> |
| Ready PD, et al <sup>161</sup>        | 2009       | United Arab Emirates | -          | Record          | -                         | -          | -                                                                                                                      |
| Spradbery JP, et al <sup>40</sup>     | 1992       | United Arab Emirates | Fujairah   | Cross-sectional | Cows, calves, and heifers | 62         | -                                                                                                                      |
| Spradbery JP, et al <sup>40</sup>     | 1992       | United Arab Emirates | -          | -               | -                         | -          | -                                                                                                                      |
| Rajapaksa N et al <sup>59</sup>       | 1977, 1985 | Australia            | -          | -               | Sheep                     | -          | -                                                                                                                      |
| Zaidi F, et al <sup>201</sup>         | 2012-2015  | Pakistan             | North West | Cross-sectional | -                         | -          | -                                                                                                                      |
| Han H, et al <sup>202</sup>           | 2017       | Malaysia             | -          | Case-series     | Dogs                      | 3          | -                                                                                                                      |
| Basset CR, et al <sup>195</sup>       | 1984       | Malaysia             | -          | -               | Cattle                    | 38(84%,45) | -                                                                                                                      |
| Basset CR, et al <sup>195</sup>       | 1982       | Malaysia             | -          | -               | Cattle                    | 2957       | -                                                                                                                      |

|                                      |      |              |                                            |                 |                                          |                                            |                                                                           |
|--------------------------------------|------|--------------|--------------------------------------------|-----------------|------------------------------------------|--------------------------------------------|---------------------------------------------------------------------------|
| Fadzil M, et al <sup>203</sup>       | 1971 | Malaysia     | -                                          | -               | Cattle                                   | -                                          | -                                                                         |
| Rajamanickam C, et al <sup>204</sup> | 1986 | Malaysia     | -                                          | -               | Cattle                                   | 124(95%,130)                               | -                                                                         |
| Ready PD, et al <sup>161</sup>       | 2009 | Malaysia     | -                                          | Record          | -                                        | -                                          | -                                                                         |
| Norval RA <sup>205</sup>             | 1978 | Zimbabwe     | -                                          | -               | Cattle                                   | Cattle losses exceeding 250,000 in 1977/78 | Wide spread of tick-borne diseases and associated screw-worm infestations |
| Cuthbertson A <sup>173</sup>         | 1933 | Zimbabwe     | -                                          | -               | Cattle                                   | -                                          | -                                                                         |
| Cuthbertson A <sup>173</sup>         | 1933 | Zimbabwe     | -                                          | -               | Horses                                   | -                                          | -                                                                         |
| Cuthbertson A <sup>173</sup>         | 1933 | Zimbabwe     | -                                          | -               | Dogs                                     | -                                          | -                                                                         |
| Ready PD, et al <sup>161</sup>       | 2009 | Zimbabwe     | -                                          | Record          | Cattle, horses, goats, sheep, pigs, dogs | -                                          | Larvae collected from wounds of several host species in 2002              |
| Spradbery JP*                        | 2017 | Singapore    | Singapore Zoo                              | Outbreak report | Rusa unicolor or Cervus unicolor         | -                                          | -                                                                         |
| Fain A, et al <sup>206</sup>         | 1959 | DRC          | Uele                                       | -               | African elephants                        | -                                          | -                                                                         |
| Rovere A, et al <sup>3</sup>         | 1910 | DRC          | -                                          | -               | -                                        | -                                          | -                                                                         |
| Baker JA, et al <sup>172</sup>       | 1968 | South Africa | The Eastern Cape Province                  | -               | Cattle                                   | A huge number                              | -                                                                         |
| Ready PD, et al <sup>161</sup>       | 2009 | Bahrain      | -                                          | Record          | -                                        | -                                          | -                                                                         |
| Spradbery JP, et al <sup>40</sup>    | 1992 | Bahrain      | -                                          | -               | -                                        | -                                          | -                                                                         |
| Ready PD, et al <sup>161</sup>       | 2009 | Cameroon     | -                                          | Record          | -                                        | -                                          | -                                                                         |
| Ready PD, et al <sup>161</sup>       | 2009 | Chad         | -                                          | Record          | -                                        | -                                          | -                                                                         |
| Ready PD, et al <sup>161</sup>       | 2009 | Myanmar      | -                                          | Record          | -                                        | -                                          | -                                                                         |
| Bandara W, et al <sup>207</sup>      | 2014 | Sri Lanka    | Peradeniya                                 | Cross-sectional | Dogs                                     | 294                                        | -                                                                         |
| Bandara W, et al <sup>207</sup>      | 2014 | Sri Lanka    | Peradeniya                                 | Cross-sectional | Cats                                     | 5                                          | -                                                                         |
| Obanda V, et al <sup>208</sup>       | 2012 | Kenya        | Kigio Wildlife Conservancy, Nairobi        | -               | Elands (Taurotragus oryx)                | -                                          | -                                                                         |
| Meemark N, et al <sup>209</sup>      | 1988 | Thailand     | Villages in the north and east of Thailand | Cross-sectional | NR                                       | -                                          | -                                                                         |
| Zumt F <sup>210</sup>                | 1965 | Ethiopia     | -                                          | -               | Cattle                                   | -                                          | -                                                                         |

\* Spradbery et al. Pers.comm.

## Reference



175. Spradbery J, Sands D, Tozer R. Distribution and pest status of the Old World screw-worm fly, *Chrysomya bezziana*, in Papua New Guinea and the threat to Australian livestock and wildlife. *Austral Entomol*;2019.
176. Spradbery J, Vanniasingham J. Incidence of the screw-worm fly, *Chrysomya bezziana* at the Zoo Negara, Malaysia. *Malaysian Veterinary Journal*. 1980;7:28-32.
177. Yan R, Wong Y. Studies on *Chrysomya bezziana* Villeneuve and the myiasis it produced. *Wuyi Science Journal*. 1983;3: 157-163.
178. Zhang H. Cases report of farm cattle myiasis. Academic Annual Meeting of the Fujian Animal Husbandry and Veterinary. 2009.
179. Lan Y, Zhong T. Cases report of farm cattle myiasis. *Fujian Journal of Animal Husbandry and Veterinary*. 2001;23: 17.
180. Liao W. Cases report of pig myiasis. *Jiangxi Journal of Animal Husbandry & Veterinary Medicine*. 2015;4: 303-301.
181. Wang X, Wang Y, Xie J, Liang X, Mo F. Myiasis due to *Chrysomya bezziana*. *Guizhou Animal Science and Veterinary Medicine*. 1992;16: 3-6.
182. Wei C. Zoonotic parasitic diseases in Guizhou Province (II). *Guizhou Animal Science and Veterinary Medicine*. 1992;17: 28-32.
183. Department of Veterinary Medicine GAC. Survey of cattle and sheep parasite species in Guangxi Province. *Guangxi Agricultural Sciences*. 1978;4: 54-59.
184. Gan Y. On the larvae of the Chinese species of the subfamily *Chrysomyinae* (Dipt. Calliphoridae). *Dongwuxue Yanjiu*. 1980;1: 179-196.
185. Chemonges-Nielsen S. *Chrysomya bezziana* in pet dogs in Hong Kong: a potential threat to Australia. *Australian Veterinary Journal*. 2003;81: 202-205.
186. McNae JC, Lewis SJ. Retrospective study of Old World screwworm fly (*Chrysomya bezziana*) myiasis in 59 dogs in Hong Kong over a one year period. *Australian Veterinary Journal*. 2004;82: 211-214.
187. Alahmed AM. Myiasis in sheep farms in Riyadh Region, Saudi Arabia. *Journal of the Egyptian Society of Parasitology*. 2004;34: 153-160.
188. Abo-Shehada MN. Incidence of *Chrysomya bezziana* screw-worm myiasis in Saudi Arabia, 1999/2000. *Vet Rec*. 2005;156: 354-356. doi: 0.1136/vr.156.11.354.
189. Osman Salama, Omar Hussein. Clinical and epidemiological studies on screwworm infestation in Qassim region, Saudi Arabia. *Tropical Biomedicine*. 2017;34(3): 936-943.
190. Navidpour S, Hoghooghi-Rad N, Goodarzi H, Pooladgar AR. Outbreak of *Chrysomya bezziana* in Khoozestan province, Iran. *The Veterinary record*. 1996;139: 217.
191. Soundararajan C, Prabhu K, Nagarajan K, Divya T. Wound and gastric myiasis due to *Chrysomya bezziana* and *Cobbaldia elephantis* and its pathological lesions in wild elephants in the Nilgiris hills of Tamil Nadu. *J Parasit Dis*. 2018. doi: 10.1007/s12639-018-1068-x.
192. Bora S, Hussain L, Das M, Islam S, Bulbul H. Fly strike in broilers in Kamrup district of Assam. *Journal of Entomology and Zoology Studies*. 2018;6(2): 2439-2442.
193. Sigit SH, Partoutomo S. Myiasis in Indonesia. *Bulletin Off Int Epiz*. 1981;93: 173-178.
194. Sigit SH. Masalah myiasis padasapi di Sulawesi selatan. *Media Veterinar*. 1978;3: 1-12.
195. Basset CR, Kadir SB. The screw-worm fly (*Chrysomya bezziana*) - an obstacle to large-scale beef production in Malaysia. *Animal Production Health Tropics*. 1982: 133-135.
196. Wardhana AH, Abadi I, Cameron MM, Ready PD, Hall MJ. Epidemiology of traumatic myiasis due to *Chrysomya bezziana* in Indonesia. *JITV*. 2018;23(1): 45-60. doi: 10.14334/jitv.v23il.1617.
197. Spradbery JP, Khanfar KA, Harpham D. Myiasis in the sultanate of Oman. *Vet Rec*. 1992;131(4): 76-77. doi: 10.1136/vr.131.4.76.
198. Soundararajan C, Nagarajan K, Prakash MA. Occurrence of aural myiasis in madras red sheep and its management by herbal medicine (Tamarind Seed Coat Powder). *Indian Veterinary Journal*. 2017;94: 78-79.
199. Katoch R, Godara R, Yadav A, Sharma S, Ahmad I. Occurrence of *Chrysomya bezziana* in a buffalo in Jammu. *Journal of Parasitic Diseases: Official Organ of the Indian Society for Parasitology*. 2014;38: 420-422.
200. Kumar R, Ruprah NS. Incidence and etiology of cutaneous myiasis in Domestic animals at Hissar. *Indian Veterinary Journal*. 1984;61: 918-921.
201. Zaidi F, Fatima SH, Gul A. Dataset of traumatic myiasis observed for three dominant screw worm species in North West Pakistan with first report of *Wohlfahrtia magnifica* (Schiner). *Data in Brief*. 2016;8: 1333-1337.
202. Han HS, Sharma R, Jeffery J, Noli C. *Chrysomya bezziana* (Diptera: Calliphoridae) infestation: case report of three dogs in Malaysia treated with spinosad/milbemycin. *Veterinary Dermatology*. 2017;28: 239-262.
203. Fadzil M, Jaafa A, Soon CT. *Chrysomya bezziana* Villeneuve- Some Observations on its activity in the Tekam Research Station, Jerantut, West Malaysia. *Kajian Vet Malaysia-Singapore*.

1971;3: 10-14.

204. Rajamanickam C, Soon CT, Paramasvaran S. The prevalence of myiasis of domestic animals in peninsular Malaysia. *Kajian Vet J.* 1986;18: 153-157.

205. Norval RA. The effects of partial breakdown of dipping in African areas in Rhodesia. *Rhodesian Veterinary Journal.* 1978;9: 9-16.

206. Fain A, Magis P, Verdin G, Donkers J, Gobbels P. Sur deux cas de myiases humaines produites par *Chrysomya bezziana* Villeneuve au Congo belge. *Ann Soc Belge Med Trop.* 1959;39: 763.

207. Bandara W, Karunaratne W, Fuward R, Dangolla A, Yasakeerthi A. Myiasis in dogs and cats treated in two veterinary clinics in peradeniya, Sri Lanka. *Journal of Entomology and Zoology Studies.* 2016;4(6): 211-215.

208. Obanda V, Ndambiri E, Kingori E, Gakuya F, Lwande O, Alasaad S. Traumatic myiasis in free-ranging eland, reported from Kenya. *Parasit Vectors.* 2013;6: 89. doi: 10.1186/1756-3305-6-89.

209. Meemark N. The Development and evaluation of a village-based parasite control program for swamp buffalo and cattle in Northeast Thailand. M.Phil. Thesis, Massey University;1988.

210. Zumpt F. *Myiasis in Man and Animals in the Old World.* Butterworths, London; 1965.
